# Supplementary material
Source: PubMed Central journal article supplement (PMC3311373)
Supplement: 1107004109_sapp.pdf [file 1107004109_sapp.pdf]

SUPPORTING INFORMATION  
Bi-trophic interactions shape biodiversity in space

Franck Jabot<sup>a,b</sup> and Jordi Bascompte<sup>b\*</sup>

<sup>a</sup>Laboratoire d'Ingénierie pour les Systèmes Complexes  
IRSTEA

Campus des Cézeaux, 24 Avenue des Landais, 63172 Aubière, France

<sup>b</sup>Integrative Ecology Group  
Estación Biológica de Doñana, CSIC  
Calle Américo Vespucio s/n, E-41092 Sevilla, Spain

December 13, 2011

---

\*To whom correspondence should be addressed. E-mail: bascompte@ebd.csic.es; Phone: (+34) 954 466 700; Fax: (+34) 954 621 125.

# SI MATERIALS AND METHODS

## S1 Model Description

As described in the main text, simulations are stochastic, in a lottery manner (1). This means that at each generation (=time step),  $N_p$  plants ( $N_a$  animals) are drawn at random to replace the  $N_p$  plants ( $N_a$  animals) of the previous generation. A detailed scheme of the spatial organization of the metacommunity can be found in Fig. S1.

The probabilities of this lottery are detailed in the main text. We here provide additional explanations for the choice of seed (egg) production equations. In the mutualistic case, we consider that there is a base seed (egg) production equal to  $1 - c_p$  ( $1 - c_a$ ) for plants (animals). For the plants, this base fecundity corresponds to selfing, that we here assume constant among species for simplicity. For the animals, assuming that fecundity is proportional to diet, the base fecundity corresponds to the diet part which is not achieved during the mutualistic interaction with the plants. The additional term corresponds to the part of seed (egg) production which depends on the mutualistic interaction. For the plants, we consider that each animal of species  $j$  effectively pollinates a flower of species  $i$  at a rate  $I_{ij}$ . Hence a flower of species  $i$  is pollinated at a total rate equal to  $\sum_{j=1}^{S_a} n_j^a I_{ij}$ . We further assume that flowers compete to attract animals, so that the pollinator-mediated fecundity of a flower of species  $i$  depends on the rate at which the flower is pollinated compared to the rate at which other flowers are pollinated. This leads to the expres-

sion:  $c_p \frac{\sum_{j=1}^{S_a} n_j^a I_{ij}}{\sum_{k=1}^{S_p} \left( \frac{n_k^p}{N_p} \sum_{l=1}^{S_a} n_l^a I_{kl} \right)}$ . Our formulation implies that a flower will have a fecundity

above (below) 1 if it is more (less) pollinated than an average flower. For the animals, we consider that animals gather resources from the plant at the same rate  $I_{ij}$  that they pollinate the plant, and that the plants provide a fixed amount of resources. We assume

1 that animals compete for these resources, so that an animal of species  $j$  gathers from a  
2 plant of species  $i$  an amount of resources equal to  $\frac{I_{ij}}{\sum_{k=1}^{S_a} \frac{n_k^a}{N_a} I_{ik}}$ . When summing over the  
3 relative frequency of the plants, we recover Equation 2. We additionally studied another  
4 way to model animal fecundity, and obtained similar results (see *SI Section S2.11.2*). In  
5 the antagonistic case, the reasoning is the same, except that plants are negatively affected  
6 by the interaction.

7 This model formulation presents several advantages. First, it corresponds to a purely  
8 neutral model when removing between groups interactions. Consequently, this model  
9 enables to explore the deterministic effect of ecological interactions in a background of  
10 demographic and environmental stochasticity as is often the case in nature (2). Second,  
11 this model can be quickly simulated by coalescence, so that it is possible to fit this model  
12 to real data by Approximate Bayesian Computation (see Methods). Third, by fixing con-  
13 stant community sizes, it focuses on community composition by removing the potential  
14 confounding influence of variations in community sizes. This constant community size  
15 assumption is a good first approximation for plants in many terrestrial systems. Indeed,  
16 herbivores generally have a limited feeding effect on plant biomass for various reasons in-  
17 cluding the low food quality of many plant parts, and the control of insect herbivores by  
18 natural enemies (3). Although it is not the case for insects, their population fluctuations  
19 are likely to be mainly driven by factors not related to plants like climate (4). Conse-  
20 quently, our fixed community size assumption is a good simplifying assumption which  
21 is unlikely to make us miss any retroactions taking place between the plant and insect  
22 groups. An alternative approach would have been to use Lotka-Volterra type equations  
23 to model the coupled dynamics of plants and animals (5). A drawback of this approach  
24 is that it requires a large number of species-specific parameters like intrinsic growth rates  
25 and carrying capacities. Such an increase in the number of parameters would prevent

- 1 the model from being fitted to available data, in that we would need much additional
- 2 information on each species or community dynamics.

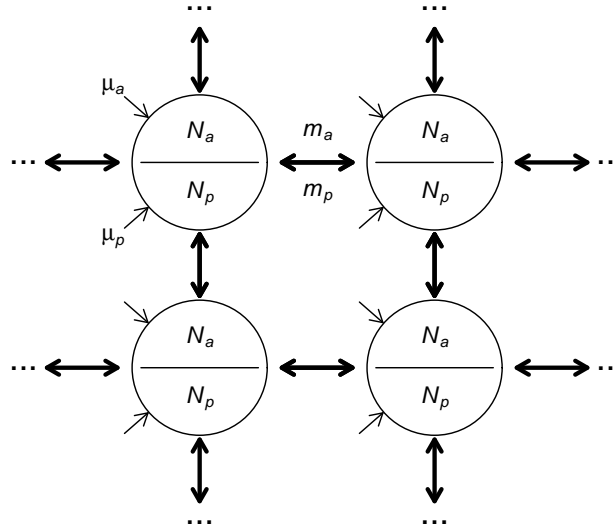

Fig. S1: Model representation. Circles stand for patches, horizontal and vertical arrows represent dispersal between neighboring patches, and oblique arrows indicate dispersal from the species pool.  $N_p$  ( $N_a$ ) is the number of plant (animal) individuals in each patch.  $m_p$  ( $m_a$ ) is the plant (animal) dispersal rate between neighboring patches.  $\mu_p$  ( $\mu_a$ ) is the plant (animal) dispersal rate from the species pool to each patch.

## 1 **S2 Model results - impact on the plant set**

### 2 **S2.1 $\alpha$ diversity of plants**

3 In this section, we detail the results obtained in Fig. 2 of the main text. Let us start by  
4 considering nested mutualistic networks produced with a threshold rule (Fig. 2A). For  
5 the limiting case of low dispersal rates and weak mutualism (low  $m_p$  and  $c_p$ ), we recover  
6 Bastolla et al.'s result (5), namely, that nested networks tend to increase plant local  
7 richness (bottom left of Fig. 2A). In this case, bi-trophic interactions have a stabilizing  
8 effect (6) induced by the heterogeneity among animals in their plant preferences. Thus,  
9 communities tend to gain species with over-dispersed traits during the coupled dynamics  
10 (see "Variance Test" in *SI Section S2.5*). This limiting case without dispersal corresponds  
11 to the standard network approach.

12 When dispersal rates increase and/or mutualistic interactions become stronger (larger  
13  $c_p$ ), the positive effect of mutualistic interactions on plant richness decreases and even  
14 becomes negative (Fig. 2A). The stabilizing effect of the mutualistic interactions is now  
15 counterbalanced by their filtering effect: plants survive only if they encounter a corre-  
16 sponding mutualist. We detect this filtering effect by computing the average interaction  
17 strength between plant and animal individuals. When mutualistic interactions have a  
18 negative impact on plant species richness, the average interaction strength increases com-  
19 pared to the neutral case (see "Coupling Test" in *SI Section S2.4*). The surviving plants  
20 are those which encounter more mutualists.

21 Similar results are obtained with antagonistic networks (Fig. 2B). In this case, when  
22 bi-trophic interactions have a negative impact on plant species richness, the average inter-  
23 action strength decreases compared to the neutral case (see "Coupling Test" in *SI Section*  
24 *S2.4*). The surviving plants are those which encounter fewer antagonists.

1       Once we have considered nested networks, we now turn our attention to highly spe-  
2 cialized networks. We obtained similar results for this type of networks (Fig. 2C-D). The  
3 common feature of both nested and specialized networks is their low average degree (i.e.,  
4 species interact on average with a low number of species), although the variance in degree  
5 distribution is larger in nested networks. This average degree hence appears to play a  
6 major role in how network architecture determines the impact of bi-trophic interactions  
7 on plant richness.

8       When interactions are generalized both mutualistic and antagonistic networks increase  
9 species richness at low dispersal rates and decrease it at high dispersal rates (Fig. 2E-F).  
10 At low dispersal rates, local species richness is mainly controlled by local interactions.  
11 When they are generalized, the filtering effect of the interactions is low, and the sta-  
12 bilizing effect predominates. Equitability in plant abundance is low without bi-trophic  
13 interactions and increases in the presence of such interactions. This increase in plant  
14 equitability is positively correlated with the variation in plant richness in the presence  
15 of interactions (see “Equitability Test” in *SI Section S2.6*). At higher dispersal rates,  
16 local species richness increases and becomes more dependent on the recurrent dispersal of  
17 locally rare species. When disrupting the fitness equivalence among individuals, interac-  
18 tions tend to destabilize this dynamic equilibrium (7). This disruption leads to a reduced  
19 equitability in species abundances and, ultimately, in species loss (see “Equitability Test”  
20 in *SI Section S2.6*). This result is in agreement with a recent meta-analysis of herbi-  
21 vore exclusion experiments showing that herbivory reduced plant species richness when  
22 equitability in plant abundances was high, and vice versa (8).

23       Along the second axis of variation, we find that mutualistic interactions have an in-  
24 creased negative effect on plant richness for stronger values of coupling  $c_p$  (Fig. 2E).  
25 This is due to an increase of the filtering effect of the interaction, as encountered earlier

1 for specialized interactions. In contrast, we find the reverse relationship for antagonis-  
2 tic interactions: stronger coupling leads to an increased positive effect on plant richness,  
3 especially at low dispersal rates (Fig. 2F). Here the stabilizing effect of herbivores ex-  
4 ceeds their filtering effect, so that the resulting effect of herbivores on plants is positive.  
5 Stronger coupling between plants and herbivores thus increase the magnitude of this pos-  
6 itive effect, especially at low dispersal rates for which local interactions have the strongest  
7 impact on community dynamics.

8 The balance between the filtering and the stabilizing effects also depends on the species  
9 richness of the plant set, both at the local and regional scales. In metacommunities with  
10 larger regional species richness, we find a stronger positive effect of both mutualistic and  
11 antagonistic interactions on local plant species richness. In contrast, in communities with  
12 larger local richness, we observe a stronger negative effect of both interaction types on  
13 plant richness, this contrast being stronger for antagonistic interactions (see *SI Section*  
14 *2.7*). These results differ from those of Thébault and Fontaine (9) who studied network  
15 dynamics in closed communities and found that higher diversity promotes persistence  
16 in mutualistic networks and destabilizes it in antagonistic ones. Our current results,  
17 therefore, show that local and regional diversity may be associated with different effects  
18 of bi-trophic interactions in spatially-extended systems. Another difference is that, as  
19 reported here, local and regional richness have a very small correlation with the effect of  
20 bi-trophic interactions on plant richness in this spatially extended model ( $R^2 = 0.01$ ).

## 21 **S2.2 $\beta$ diversity of plants**

22 Up to here, we have described patterns of local species richness, namely, plant richness  
23 at each lattice site. Our framework also enabled us to study the effect of bi-trophic inter-  
24 actions on plant richness at the regional scale, i.e., considering the regional abundances

1 across the entire lattice. When interactions have a negative effect on plant local richness,  
2  $\beta$  diversity simultaneously increases (Fig. S2). In 91% (89 %) of the cases for mutual-  
3 istic (antagonistic) interactions, the decrease in metacommunity richness is smaller than  
4 the decrease in local richness. For the small system size used in the simulations ( $5 \times 5$   
5 patches), this increase in  $\beta$  diversity is not always sufficient to make up for decreases in  
6 local richness; consequently metacommunity richness can also decrease due to both mutu-  
7 alistic and antagonistic interactions. However, as system size increases in the simulations,  
8 metacommunity richness becomes less affected by bi-trophic interactions (Fig. S3A). This  
9 means that animals do not act to filter the same plant species in every patch, thereby  
10 increasing the spatial structure of plant diversity. Indeed, when computing the relative  
11 fecundity of plant species in each patch, we find that 63% (56%) of the plant species are  
12 positively filtered in at least one patch by the mutualistic (antagonistic) animal group  
13 (see *SI Section S2.10*). These results suggest that bi-trophic interactions tend to strongly  
14 impact the spatial heterogeneity of plant diversity.



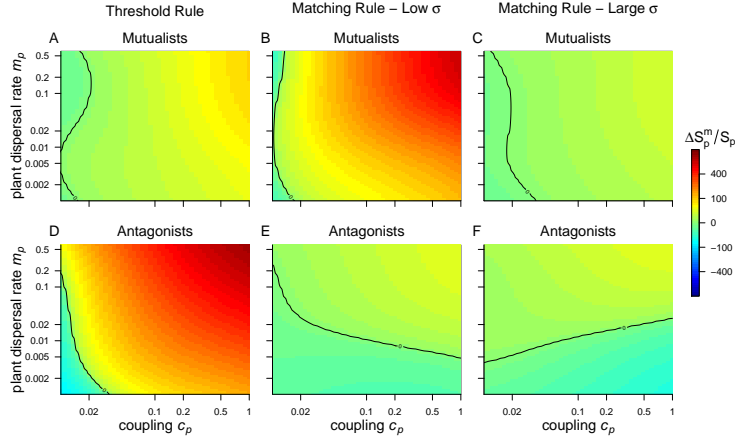

Fig. S2: Relative variation (in %) of plant  $\beta$  diversity between trophically coupled and uncoupled communities.  $\beta$  diversity is measured as the ratio of metacommunity over local plant richness  $S_p^m/S_p$ . Panels A and D display a threshold model of interaction with one trait; panels B and E show results for the matching model with one trait and  $\sigma = 0.015$ ; panels C and F are based on a matching model with one trait and  $\sigma = 1$ . Panels A-C correspond to mutualistic interactions. Panels D-F correspond to antagonistic interactions. Parameter values are  $\mu_p = \mu_a = 0.004$ ,  $m_a = 0.625$ ,  $c_a = 0.16$ .

## 1 S2.3 Effects of the model parameters on the impact of bi-trophic 2 interactions

3 As mentioned in the main text, mutualistic and antagonistic interactions can have both  
4 positive and negative effects on plant richness  $S_p$ , but also on Shannon's diversity  $H_p$ .  
5 We explore the effects of each model parameter and interaction type by multiple regres-  
6 sions (Tables S1-4). In these regressions, the dependent variable is the relative varia-  
7 tion in species richness due to the bi-trophic interactions:  $\Delta S_p = (S_p^i - S_p^n)/S_p^n$ , and  
8  $\Delta H_p = (H_p^i - H_p^n)/H_p^n$ , where the superscript  $i$  means with interaction, and  $n$  without  
9 interaction.

10 Less diverse, more dispersal-limited, and more strongly impacted plant sets are ex-  
11 perienceing a stronger filter from both mutualistic and antagonistic interactions: plant

1 dispersal rates  $m_p$  and  $\mu_p$  are positively correlated with variations in plant Shannon's  
2 index  $\Delta H_p$ , while the interaction impact on plants  $c_p$  is negatively correlated with  $\Delta H_p$   
3 (Tables S3-4). Parameter effects are less straightforward when looking at variation in  
4 plant species richness  $\Delta S_p$  (Tables S1-2), probably because they impact plant diversity  
5 patterns at both local and metacommunity scales, and these patterns have contradictory  
6 effects on local plant persistence (see below). Parameters of the animal set have overall a  
7 lower effect on plant composition.

1 Table S1: Effect of mutualistic interactions on the variation in plant species richness

2  $\Delta S_p$ .

3 \*the first (second) number is the number of matching (threshold) rules.

4  $R^2 = 0.52$

5

| Parameter  | Estimate | Standard Error | <i>p</i> -value |
|------------|----------|----------------|-----------------|
| Intercept  | -0.08    | 0.002          | <2e-16          |
| $\mu_p$    | 5.06     | 0.18           | <2e-16          |
| $\mu_a$    | 3.11     | 0.18           | <2e-16          |
| $m_p$      | -0.09    | 0.001          | <2e-16          |
| $m_a$      | -0.03    | 0.001          | <2e-16          |
| $c_p$      | -0.53    | 0.001          | <2e-16          |
| $c_a$      | 0.09     | 0.001          | <2e-16          |
| Model_1-0* | -0.12    | 0.002          | <2e-16          |
| Model_0-2* | -0.13    | 0.002          | <2e-16          |
| Model_1-1* | -0.25    | 0.002          | <2e-16          |
| Model_2-0* | -0.19    | 0.002          | <2e-16          |
| Model_1-2* | -0.33    | 0.002          | <2e-16          |
| Model_2-1* | -0.30    | 0.002          | <2e-16          |
| Model_2-2* | -0.37    | 0.002          | <2e-16          |
| $\sigma$   | 0.04     | 0.0001         | <2e-16          |

6

1 Table S2: Effect of antagonistic interactions on the variation in plant species richness

2  $\Delta S_p$ .

3 \*the first (second) number is the number of matching (threshold) rules.

4  $R^2 = 0.12$

5

| Parameter   | Estimate | Standard Error | <i>p</i> -value |
|-------------|----------|----------------|-----------------|
| Intercept   | -0.17    | 0.007          | <2e-16          |
| $\mu_p$     | -17.87   | 0.73           | <2e-16          |
| $\mu_a$     | 9.01     | 0.73           | <2e-16          |
| $m_p$       | -0.38    | 0.005          | <2e-16          |
| $m_a$       | -0.04    | 0.005          | 6e-13           |
| $c_p$       | 0.09     | 0.003          | <2e-16          |
| $c_a$       | 0.14     | 0.003          | <2e-16          |
| Model__1-0* | 0.27     | 0.007          | <2e-16          |
| Model__0-2* | -0.43    | 0.009          | <2e-16          |
| Model__1-1* | -0.39    | 0.007          | <2e-16          |
| Model__2-0* | 0.14     | 0.007          | <2e-16          |
| Model__1-2* | -0.56    | 0.007          | <2e-16          |
| Model__2-1* | -0.37    | 0.007          | <2e-16          |
| Model__2-2* | -0.51    | 0.007          | <2e-16          |
| $\sigma$    | 0.06     | 0.0004         | <2e-16          |

6

1 Table S3: Effect of mutualistic interactions on the variation in plant equitability  $\Delta H_p$ .

2 \*the first (second) number is the number of matching (threshold) rules.

3  $R^2 = 0.49$

4

| Parameter  | Estimate | Standard Error | <i>p</i> -value |
|------------|----------|----------------|-----------------|
| Intercept  | -0.07    | 0.002          | <2e-16          |
| $\mu_p$    | 14.15    | 0.19           | <2e-16          |
| $\mu_a$    | 1.96     | 0.19           | <2e-16          |
| $m_p$      | 0.06     | 0.001          | <2e-16          |
| $m_a$      | -0.03    | 0.001          | <2e-16          |
| $c_p$      | -0.47    | 0.001          | <2e-16          |
| $c_a$      | 0.08     | 0.001          | <2e-16          |
| Model_1-0* | -0.19    | 0.002          | <2e-16          |
| Model_0-2* | -0.13    | 0.002          | <2e-16          |
| Model_1-1* | -0.30    | 0.002          | <2e-16          |
| Model_2-0* | -0.29    | 0.002          | <2e-16          |
| Model_1-2* | -0.39    | 0.002          | <2e-16          |
| Model_2-1* | -0.38    | 0.002          | <2e-16          |
| Model_2-2* | -0.45    | 0.002          | <2e-16          |
| $\sigma$   | 0.05     | 0.0001         | <2e-16          |

5

1 Table S4: Effect of antagonistic interactions on the variation in plant equitability  $\Delta H_p$ .

2 \*the first (second) number is the number of matching (threshold) rules.

3  $R^2 = 0.33$

4

| Parameter  | Estimate | Standard Error | <i>p</i> -value |
|------------|----------|----------------|-----------------|
| Intercept  | -0.36    | 0.002          | <2e-16          |
| $\mu_p$    | 18.71    | 0.23           | <2e-16          |
| $\mu_a$    | -0.24    | 0.23           | 0.31            |
| $m_p$      | 0.03     | 0.002          | <2e-16          |
| $m_a$      | -0.03    | 0.002          | <2e-16          |
| $c_p$      | -0.40    | 0.001          | <2e-16          |
| $c_a$      | 0.07     | 0.001          | <2e-16          |
| Model_1-0* | 0.32     | 0.002          | <2e-16          |
| Model_0-2* | -0.08    | 0.003          | <2e-16          |
| Model_1-1* | -0.07    | 0.002          | <2e-16          |
| Model_2-0* | 0.26     | 0.002          | <2e-16          |
| Model_1-2* | -0.08    | 0.002          | <2e-16          |
| Model_2-1* | -0.04    | 0.002          | <2e-16          |
| Model_2-2* | -0.04    | 0.002          | <2e-16          |
| $\sigma$   | 0.01     | 0.0001         | <2e-16          |

5

## 1 S2.4 Coupling Test

2 Animals have two opposite effects on plant assemblages. Individually, they have a filtering  
3 effect by introducing fitness differences among species. But collectively, they have a sta-  
4 bilizing effect by introducing some kind of heterogeneity in resources (6). The emergent  
5 effect of the interactions thus depends on the relative importance of these two counter-  
6 acting effects.

7 We introduce a statistic ( $IS$ ) that measures the average interaction strength between  
8 plants and animals:

$$IS = \frac{\sum_{i,j} I_{ij}}{S_p S_a}, \quad (S1)$$

9 where  $I_{ij}$  indicates the interaction strength between plant  $i$  and animal  $j$ . Before starting  
10 the dynamics with bi-trophic interactions, we compute the initial interaction strength  $IS^n$   
11 between plants and animals. To do this, we use plant and animal abundances obtained  
12 with neutral assembly and  $I_{ij}$  values subsequently used in the dynamics with interactions.  
13 At the end of the dynamics with interactions (100 generations forward), we compute the  
14 final interaction strength  $IS^i$  between plants and animals, using final abundances of plants  
15 and animals. We record the variation of the interaction strength  $\Delta IS = IS^i - IS^n$  due  
16 to the dynamics with bi-trophic interactions. When interactions are mutualistic and  
17 their impact on plants is dominated by the filtering effect, plants survive only if they  
18 encounter some well-adapted mutualists. Interactions should thus produce an increase of  
19 the statistics  $IS$ . For antagonistic interactions, on the contrary, plants survive only if they  
20 do not encounter well-adapted antagonists, and the statistics  $IS$  should then decrease. If  
21 our interpretation is correct, then  $\Delta S_p$  should be negatively (positively) correlated with  
22  $\Delta IS$  when interactions are mutualistic (resp. antagonistic). This is what we observed

1 ( $R^2 = 0.02$  and  $0.03$  respectively,  $p < 0.001$ ). Note that  $IS$  is not correlated with  $S_p$  and  
2  $H_p$ , hence the correlation observed here is not spurious.

### 3 **S2.5 Variance Test**

4 To measure the stabilizing effect of the bi-trophic interactions, we use the statistic  $VT$   
5 which measures the average variance in trait values among plant individuals, the average  
6 being done among the  $t$  traits involved in the interactions. The stabilizing effect should  
7 produce an increase in  $VT$ . If our interpretation is correct, then  $\Delta S_p$  should be positively  
8 correlated with  $\Delta VT$ . A possible confounding effect, though, is that  $VT$  is positively cor-  
9 related with  $S_p$  and  $H_p$ . Hence, this dependence of  $VT$  should be taken into account when  
10 testing for a correlation between  $\Delta VT$  and  $\Delta S_p$ . To do this, we fit a multiple linear regres-  
11 sion of  $VT^n$  against  $S_p^n$  and  $H_p^n$  using the simulated non-interacting communities. We then  
12 use this fitted regression to predict  $VT_{fit}^i$  based on the values of  $S_p^i$  and  $H_p^i$  observed in the  
13 interacting communities. We then define a modified  $\Delta VT = (VT_{observed}^i - VT_{fit}^i) / VT_{fit}^i$ .  
14 Using this conservative statistic, we find a positive correlation between  $\Delta VT$  and  $\Delta S_p$   
15 ( $R^2 = 0.56$  and  $0.10$  respectively,  $p < 0.001$ ).

### 16 **S2.6 Equitability Test**

17 Hillebrand et al. (8) meta-analyzed herbivore exclusion experiments, and found that her-  
18 bivory was reducing (increasing) plant species richness when equitability in plant abun-  
19 dances (measured by  $H' = H/\ln(S)$ ) was high (low). We found the same negative rela-  
20 tionship between the equitability before the interactions  $H^n = H_p^n/\ln(S^n)$  and  $\Delta S_p$  ( $R^2$   
21  $= 0.007$  and  $0.019$  respectively,  $p < 0.001$ ), and this relationship was stronger for antago-  
22 nistic and generalized interactions (i.e., matching interaction rule with one or two traits,  
23 and  $\sigma > 1$ ,  $R^2 = 0.008$  and  $0.09$  respectively,  $p < 0.001$ ).



## 1 **S2.7 Effect of network richness on the impact of bi-trophic inter-** 2 **actions**

3 We also investigate the effect of species richness at both the local patch, and the (land-  
4 scape) metacommunity on the variation in plant species richness by linear regressions. As  
5 mentioned in the main text, larger metacommunity richness is associated with stronger  
6 positive effect of both mutualistic and antagonistic interactions on plant species richness,  
7 while larger local richness is associated with stronger negative effect of both interaction  
8 types ( $R^2 = 0.01$ ,  $p < 0.001$ ).

## 9 **S2.8 Temporal turnover**

10 As mentioned in the main text, two statistics of temporal turnover in species composition  
11 from one generation to the next have been computed for both plants and animals, in  
12 both uncoupled and coupled metacommunities. The first statistic is the Jaccard index of  
13 similarity  $J$  and is computed as follows:

$$J = \frac{\sum_i I(n_i^t > 0) I(n_i^{t-1} > 0)}{\sum_i I(n_i^t + n_i^{t-1} > 0)}, \quad (\text{S2})$$

14 where  $n_i^t$  is the number of individuals of species  $i$  at generation  $t$ , and  $I(n > 0)$  equals 1  
15 if  $n > 0$  and 0 otherwise.

16 The second statistic is an abundance-weighted version of the Jaccard index and is  
17 computed as follows:

$$J_q = \frac{\sum_i I(n_i^t > 0) I(n_i^{t-1} > 0) (n_i^t + n_i^{t-1})}{\sum_i (n_i^t + n_i^{t-1})}, \quad (\text{S3})$$

18 Larger  $J$  and  $J_q$  values indicate a lower temporal turnover.

19 We investigate how variations in community equitability due to bi-trophic interactions

1 are correlated with variations in the temporal turnover of communities due to these same  
2 bi-trophic interactions. Temporal turnover is measured with the Jaccard index of similar-  
3 ity across time steps ( $J$ ) and its abundance-weighted version ( $J_q$ ). Since these statistics  
4 are correlated with  $H_p$  in non-interacting communities, variations in  $H_p$  due to the interac-  
5 tions could mechanically cause variations in  $J$  and  $J_q$ , without any real effect of bi-trophic  
6 interactions on the way community composition varies with time. We hence fit two linear  
7 regressions of  $J^n$  and  $J_q^n$  against  $H_p^n$  using the simulated non-interacting communities. We  
8 then use this fitted regression to predict  $J_{fit}^i$  and  $J_{qfit}^i$  based on the values of  $H_p^i$  observed  
9 in the interacting communities. We then define a modified  $\Delta J = (J_{observed}^i - J_{fit}^i) / J_{fit}^i$ ,  
10 and a modified  $\Delta J_q = (J_{observed}^i - J_{qfit}^i) / J_{qfit}^i$ . Using these conservative statistics, we  
11 find a positive correlation between  $\Delta J$  and  $\Delta H_p$  for both mutualistic and antagonistic  
12 interactions ( $R^2 = 0.44$  and  $0.35$  respectively,  $p < 0.001$ ), and between  $\Delta J_q$  and  $\Delta H_p$  ( $R^2$   
13  $= 0.72$  and  $0.02$  respectively,  $p < 0.001$ ). Since  $J$  and  $J_q$  measure temporal similarity, this  
14 means that in communities experiencing a stronger filter from the bi-trophic interactions  
15 (lower  $\Delta H_p$ ), temporal turnover will be larger than expected if bi-trophic interactions  
16 were not modifying community dynamics. In such communities, a core of plant species  
17 are temporally stabilized by the interactions, while a subset of species become satellites  
18 which are temporally unstable (10).

## 19 **S2.9 Interactions mostly affect rare species**

20 Mutualists and antagonists principally affect the presence and abundance of rare plant  
21 species. When comparing coupled and uncoupled plant communities, the abundance-  
22 weighted measure of similarity  $J_q$  is larger than the unweighted measure  $J$  in 97% (resp.  
23 95%) of the cases for mutualistic (resp. antagonistic) interactions.

## 1 **S2.10 Interactions produce a spatially heterogeneous filter**

2 At the end of the coupled metacommunity dynamics, we test whether the filtering effect  
3 of the animal set on the plant one is homogeneous across space. To do this, we compute  
4 the relative fecundity of each plant species in each patch. The relative fecundity of plant  
5 species  $i$  equals  $f_i^p / \sum_k \frac{n_k^p}{N_p} f_k^p$ . For each plant species, we count the number of patches where  
6 its relative fecundity is above 1, meaning that it obtains a local competitive advantage  
7 due to bi-trophic interactions. We find that 63% (56%) of the plant species are positively  
8 filtered in at least one patch due to mutualistic (antagonistic) interactions. To perform  
9 this analysis, we used a large grid of  $20 \times 20$  patches, and a subset of parameter values:  $\mu_p$   
10 and  $\mu_a$  in  $\{0.0005; 0.004\}$ ,  $m_p$  and  $m_a$  in  $\{0.005; 0.625\}$ ,  $c_p$  and  $c_a$  in  $\{0.04; 0.64\}$ . We only  
11 considered interaction rules with one trait, using either a threshold rule or a matching rule  
12 with  $\sigma$  in  $\{0.015; 1\}$ . We performed 10 replicates per combination of parameters values.

## 13 **S2.11 Robustness of the results**

### 14 **S2.11.1 Effect of the number of patches used in the simulations**

15 To perform this computer intensive study, we used a relatively small number of patches:  
16 a grid of  $l \times l$  patches, with  $l = 5$ . We performed additional simulations with  $l = 10$ ,  
17 and  $l = 20$  for a subset of parameter values:  $\mu_p = \mu_a = 0.005$ ,  $m_p$  in  $\{0.001; 0.005;$   
18  $0.025; 0.125; 0.625\}$ ,  $m_a$  in  $\{0.005; 0.625\}$ ,  $c_p$  in  $\{0.01; 0.04; 0.16; 0.64; 1\}$ , and  $c_a = 0.01$ .  
19 For these simulations, we only considered interaction rules with one trait, using either  
20 a threshold rule, or a matching rule with  $\sigma$  in  $\{0.015; 0.125; 1; 8\}$ . We performed 10  
21 replicates per combination of parameters values, and computed in each simulation the  
22 variation in plant metacommunity richness due to bi-trophic interactions  $\Delta S_p^{met}$ , and the  
23 variation in local plant richness  $\Delta S_p$ . As the number of patches in the metacommunity  
24 increases, the distribution of  $\Delta S_p^{met}$  converges to zero (Fig. S3A). On the contrary, system

1 size has little impact on the variation in local plant richness due to bi-trophic interactions  
2 (Fig. S3B). This means that for large (and realistic) system sizes, bi-trophic interactions  
3 have a weak effect on metacommunity richness, but change local richness patterns, and  
4 hence the spatial structure of plant diversity.

5 We additionally performed correlations between  $\Delta S_p$  and  $\Delta H_p$  in these simulations  
6 with larger  $l$ , and the statistics  $\Delta S_p$ , and  $\Delta H_p$  of the main text. We computed the  
7 correlations  $R^2$ , as well as the slopes and intercepts of reduced major axis regressions,  
8 using the R package "smatr" (11). Correlations were high ( $R \geq 0.91$ ), intercepts close to  
9 0 ( $|intercept| \leq 0.062$ ), and slopes close to 1 ( $|slope - 1| \leq 0.081$ ).

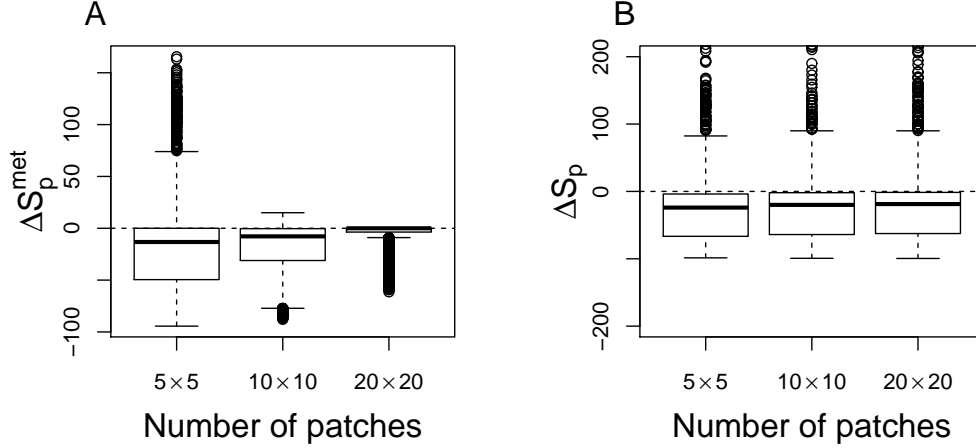

Fig. S3: Effect of system size on bi-trophic impact. Panel A: Distribution of  $\Delta S_p^{met}$  as a function of the number  $l * l$  of patches in the simulations. Panel B: Distribution of  $\Delta S_p$  as a function of the number  $l * l$  of patches in the simulations.

### 1 S2.11.2 Symmetric model of interaction

2 We evaluated the sensitivity of our results to the way we modeled the plants' impact  
 3 on their interactors. We considered alternative models of mutualistic and antagonistic  
 4 interactions, replacing Eq. (2) in the main text by:

$$f_i^a = (1 - c_a) + c_a \frac{\sum_{j=1}^{S_p} n_j^p I_{ji}}{\sum_{k=1}^{S_a} \left( \frac{n_k^a}{N_a} \sum_{l=1}^{S_p} n_l^p I_{lk} \right)}. \quad (S4)$$

5 We performed the same simulation analysis of these two models on a subset of the  
 6 parameter grid: we used the same subset as for the analysis studying the variation in  
 7 number of patches. We computed the same statistics  $\Delta S_p$  and  $\Delta H_p$ , which summarize  
 8 the way interactions affect community composition. For these calculations, community  
 9 statistics were averaged over the 10 simulated replicates. For each of these statistics, we  
 10 computed the correlations  $R^2$  between their values in these symmetric models, and  
 11 their values in the models reported in the main text, as well as the slopes and intercepts

1 of reduced major axis regressions. Correlations were high ( $R \geq 0.95$ ), intercepts close to  
2 0 ( $|intercept| \leq 0.062$ ), and slopes close to 1 ( $|slope - 1| \leq 0.051$ ).

### 3 **S2.11.3 Variation in community size**

4 We evaluated the robustness of our results to variations in the animal group sizes  $N_a$ .  
5 We considered the alternative values  $N_a = 40$ , and  $N_a = 1000$ . We performed the same  
6 simulation analysis as in the main text, on a subset of the parameter grid: we used the  
7 same subset as for the analysis studying the variation in number of patches. We computed  
8 the same statistics  $\Delta S_p$  and  $\Delta H_p$ , which summarize the way interactions affect community  
9 composition. For these calculations, community statistics were averaged over the 10  
10 simulated replicates. For each of these statistics, we computed the correlations  $R^2$  with  
11 the simulations of the main text, as well as the slopes and intercepts of reduced major axis  
12 regressions. Correlations were high ( $R \geq 0.89$ ), intercepts close to 0 ( $|intercept| \leq 0.072$ ),  
13 and slopes close to 1 ( $|slope - 1| \leq 0.124$ ).

### 14 **S2.11.4 Variation in boundary conditions**

15 We evaluated the robustness of our results to boundary conditions. We considered two  
16 alternative conditions: a reflexive condition, where migrants crossing the boundary return  
17 to their patch of origin; and a condition where migrants crossing the boundary are lost. We  
18 performed the same simulation analysis as in the main text, on a subset of the parameter  
19 grid: we used the same subset as for the analysis studying the variation in number of  
20 patches. We computed the two statistics  $\Delta S_p$  and  $\Delta H_p$ . For each of these statistics, we  
21 computed the correlations  $R^2$  with the simulations of the main text, as well as the slopes  
22 and intercepts of reduced major axis regressions. Correlations were high ( $R \geq 0.95$ ),  
23 intercepts close to 0 ( $|intercept| \leq 0.024$ ), and slopes close to 1 ( $|slope - 1| \leq 0.046$ ).

### 1 **S3 Model results - impact on the animal set**

2 We performed similar analyses, focusing this time on the effect of bi-trophic interactions  
3 on the animal set. Overall, we found very similar results. The analogue of Fig. 2 for  
4 animals is reported in Fig. S4, while the analogue of Fig. S2 is reported in Fig. S5. By  
5 comparing Fig. 2 and Fig. S4, one can note that the main differences is that herbivores are  
6 more positively impacted than plants by bi-trophic interactions when they are specialized  
7 (Panel D in Fig.2, panel E in Fig. S4), while this is the opposite when interactions are  
8 generalized (Panels F in the two figures). Indeed, when they are specialized, herbivores  
9 feed on different plant species and thereby easily coexist (12), while for plants, another  
10 effect is at stake: although herbivore feeding have a stabilizing effect (13), specialized  
11 herbivores also induce fitness differences among species, while generalized herbivores have  
12 a more equalized effect.

13 The coupling test (see *Section S2.4*) provides coherent results. When animals are neg-  
14 atively filtered by bi-trophic interactions, the average interaction strength  $IS$  increases  
15 for both mutualists and antagonists ( $R^2 = 0.07$  and  $0.02$  respectively,  $p < 0.001$ ): only  
16 the more interacting animals are surviving. The variance test (see *Section S2.5*) is also  
17 providing coherent results: when animals are positively impacted by bi-trophic interac-  
18 tions, their trait variance increase in both mutualistic and antagonistic cases ( $R^2 = 0.11$   
19 and  $0.005$  respectively,  $p < 0.001$ ). As for plants, larger animal metacommunity richness is  
20 associated with more positive bi-trophic effect, while we observe the opposite correlation  
21 with animal local richness in both mutualistic and antagonistic cases ( $R^2 = 0.08$  and  $0.03$   
22 respectively,  $p < 0.001$ , see *Section S2.7*). Temporal similarity in animal composition (mea-  
23 sured by  $J$  and  $J_q$ ) is also positively correlated with animal equitability  $H_a$ , as we had  
24 observed for plants ( $R^2 = 0.0001$  and  $0.0001$  respectively for  $J$  and  $R^2 = 0.001$  and  $0.0001$

1 for  $J_q$ ,  $p < 0.001$ , see *Section S2.8*). Finally, bi-trophic interactions are also mostly impact-  
 2 ing rare animal species: when comparing coupled and uncoupled animal communities, the  
 3 abundance-weighted measure of similarity  $J_q$  is larger than the unweighted measure  $J$  in  
 4 97% (92%) of the cases for mutualistic (antagonistic) interactions (see *Section S2.9*).

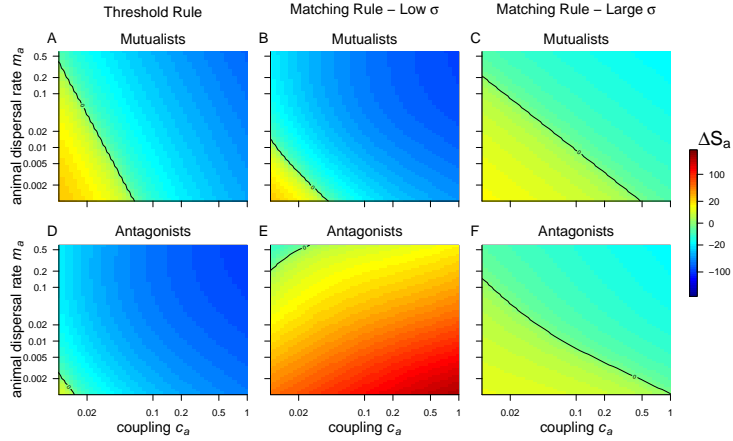

Fig. S4: Relative variation (in %) of animal  $\alpha$  diversity between trophically coupled and uncoupled communities.  $\alpha$  diversity is measured as the local animal species richness  $S_a$ . A positive value means that trophically coupled communities are species-richer than uncoupled ones. Different panels show results for the threshold model with one trait (A and D), the matching model with one trait and  $\sigma = 0.015$  (B and E), and the matching model with one trait and  $\sigma = 1$  (C and F). Panels A-C correspond to mutualistic interactions, while panels D-F correspond to antagonistic interactions. Parameter values are  $\mu_p = \mu_a = 0.004$ ,  $m_p = 0.625$ ,  $c_p = 0.16$ .



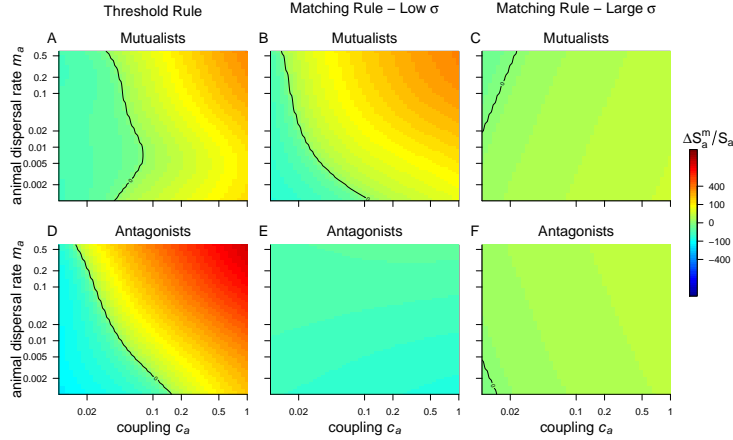

Fig. S5: Relative variation (in %) of animal  $\beta$  diversity between trophically coupled and uncoupled communities.  $\beta$  diversity is measured as the ratio of metacommunity over local animal richness  $S_a^m/S_a$ . Panels A and D display a threshold model of interaction with one trait; panels B and E show results for the matching model with one trait and  $\sigma = 0.015$ ; panels C and F are based on a matching model with one trait and  $\sigma = 1$ . Panels A-C correspond to mutualistic interactions. Panels D-F correspond to antagonistic interactions. Parameter values are  $\mu_p = \mu_a = 0.004$ ,  $m_p = 0.625$ ,  $c_p = 0.16$ .

## 1 S4 Application to real datasets

### 2 S4.1 Approximate Bayesian Computation (ABC) procedure

3 Since the effects of the interactions depend on the interaction rules used (Tables S1-4),  
 4 and given that not all interaction rules lead to realistic ecological networks (14), we want  
 5 to constrain our simulation results so that they use realistic network structure. To fit  
 6 observed networks, we use Approximate Bayesian Computation (15). It consists here in  
 7 six steps (see Fig. 1 in the main text).

8 First, we simulate a neutral uncoupled metacommunity of plants and animals to serve  
 9 as a benchmark to quantify bi-trophic impact on the plant set, drawing at random all  
 10 the model parameters in uniform prior distributions. Prior distributions express our

1 uncertainty on the parameters values before confronting them to real data.

2 Second, starting from this neutral metacommunity, we simulate a coupled dynamics of  
3 plants and animals using Eqs. (1) and (2) of main text, choosing one of the 8 interaction  
4 rules in turn, and drawing at random all the additional model parameters (linked to the  
5 interaction) in uniform prior distributions. The prior distributions were tailored to each  
6 dataset so as to reduce computing time. Indeed, only some areas of the parameter space  
7 are likely to produce networks similar to the observed ones. The priors used for each  
8 dataset are reported in Table S5.

9 Third, at the end of the dynamics, a network of interactions is simulated with the  
10 same total number of interactions  $N_n^{obs}$  as in the real dataset.  $N_n^{obs}$  animals are drawn  
11 at random proportionally to their local abundance, and they are simulated to interact  
12 with one of the plant species. An animal  $j$  interacts with a plant  $i$  proportionally to  $n_i^p I_{ij}$   
13 where  $I_{ij}$  is computed with the model parameters used in the simulation.

14 Fourth, four summary statistics of the simulated networks are computed: the plant  
15 species richness in the network  $S_p^s$ , the animal species richness in the network  $S_a^s$ , the  
16 nestedness index  $Ne_p$ , and the specialization index  $\phi$ .

17 Fifth, the computed network statistics of the simulations are used to select the best-fit  
18 simulations. The simulations are retained if both  $|S_p^s - S_p^{obs}| \leq 5$  and  $|S_a^s - S_a^{obs}| \leq 5$ , and  
19 the simulation procedure goes on until a total of 2000 such simulations are produced. Out  
20 of these 2000 simulations, 200 are retained which statistics  $\phi$ , and  $Ne_p$  lead to the smallest  
21 Euclidean distance to the observed values  $(\phi^{obs}, Ne_p^{obs})$ . Each statistic is normalized before  
22 performing this selection (15).

23 Sixth, these retained simulations are used to compute the approximate posterior dis-  
24 tribution of the statistics  $\Delta S_p$ ,  $\Delta H_p$ ,  $\Delta J$ , and  $\Delta J_q$ , which describe the impact of the  
25 interactions on plant composition and dynamics. A large part of the variation in the pos-

1 terior distribution of these statistics is explained by the variation among the simulations  
2 of the two model parameters  $m_p$  and  $c_p$ . Therefore, approximate posterior distributions  
3 are plotted as a function of these two parameters (see the section “Predicted effect of the  
4 interactions in real networks based on best-fit simulations” below).

1 Table S5: Priors used for the Approximate Bayesian Computation.

2  $\ln(m_p)$  is always drawn in  $[\ln(0.001) ; \ln(0.2)]$ .  $\ln(c_p)$  is always drawn in  $[\ln(0.01) ; \ln(1)]$ .

3  $\ln(\sigma)$  is always drawn in  $[\ln(0.01) ; \ln(10)]$ .

4

| Datasets      |                              |                               | Priors                       |                              |                            |
|---------------|------------------------------|-------------------------------|------------------------------|------------------------------|----------------------------|
| Code          | Interaction Type             | Citation                      | $\ln(\mu_p)$                 | $\ln(\mu_a)$                 | $\ln(m_a)$                 |
| <i>ARIZ</i>   | Pollination                  | Arizmendi and Ornelas (1990)  | $[\ln(0.0001) ; \ln(0.02)]$  | $[\ln(0.0001) ; \ln(0.011)]$ | $[\ln(0.001) ; \ln(0.2)]$  |
| <i>BAHE</i> ♣ | Pollination                  | Barrett and Helenurm (1987)   | $[\ln(0.0001) ; \ln(0.02)]$  | $[\ln(0.1002) ; \ln(0.5)]$   | $[\ln(0.001) ; \ln(0.2)]$  |
| <i>BAUE</i>   | Pollination                  | Bauer (1983)                  | $[\ln(0.0001) ; \ln(0.02)]$  | $[\ln(0.0005) ; \ln(0.02)]$  | $[\ln(0.001) ; \ln(0.2)]$  |
| <i>BEZE</i>   | Pollination                  | Bezerra et al. (2009)         | $[\ln(0.0001) ; \ln(0.02)]$  | $[\ln(0.0001) ; \ln(0.018)]$ | $[\ln(0.001) ; \ln(0.2)]$  |
| <i>BRIA</i>   | Pollination                  | Brian (1957)                  | $[\ln(0.0002) ; \ln(0.02)]$  | $[\ln(0.0001) ; \ln(0.01)]$  | $[\ln(0.001) ; \ln(0.2)]$  |
| <i>BRHO</i>   | Pollination                  | Brown and Hopkins (1995)      | $[\ln(0.0001) ; \ln(0.02)]$  | $[\ln(0.0002) ; \ln(0.02)]$  | $[\ln(0.001) ; \ln(0.2)]$  |
| <i>DIHI</i> ♣ | Pollination                  | Dicks et al. (2002)           | $[\ln(0.0002) ; \ln(0.007)]$ | $[\ln(0.01) ; \ln(0.02)]$    | $[\ln(0.11) ; \ln(0.2)]$   |
| <i>DISH</i> ♣ | Pollination                  | Dicks et al. (2002)           | $[\ln(0.0001) ; \ln(0.02)]$  | $[\ln(0.002) ; \ln(0.02)]$   | $[\ln(0.11) ; \ln(0.2)]$   |
| <i>ELBE</i> ♣ | Pollination                  | Elberling and Olesen (1999)   | $[\ln(0.0015) ; \ln(0.018)]$ | $[\ln(0.47) ; \ln(0.6)]$     | $[\ln(0.001) ; \ln(0.2)]$  |
| <i>HARD</i>   | Pollination                  | Harder (1985)                 | $[\ln(0.0001) ; \ln(0.02)]$  | $[\ln(0.0001) ; \ln(0.013)]$ | $[\ln(0.001) ; \ln(0.2)]$  |
| <i>MACI</i>   | Pollination                  | Macior (1978)                 | $[\ln(0.0001) ; \ln(0.02)]$  | $[\ln(0.0001) ; \ln(0.015)]$ | $[\ln(0.001) ; \ln(0.2)]$  |
| <i>MEMM</i> ♣ | Pollination                  | Memmott (1999)                | $[\ln(0.0001) ; \ln(0.02)]$  | $[\ln(0.0252) ; \ln(0.239)]$ | $[\ln(0.001) ; \ln(0.19)]$ |
| <i>OLLE</i> ♣ | Pollination                  | Ollerton et al. (2003)        | $[\ln(0.0001) ; \ln(0.013)]$ | $[\ln(0.0074) ; \ln(0.02)]$  | $[\ln(0.051) ; \ln(0.2)]$  |
| <i>SCHM</i> ♣ | Pollination                  | Schemske (1978)               | $[\ln(0.0001) ; \ln(0.02)]$  | $[\ln(0.0036) ; \ln(0.02)]$  | $[\ln(0.001) ; \ln(0.2)]$  |
| <i>SNOW</i>   | Pollination                  | Snow and Snow (1972)          | $[\ln(0.0002) ; \ln(0.02)]$  | $[\ln(0.0001) ; \ln(0.012)]$ | $[\ln(0.001) ; \ln(0.2)]$  |
| <i>VAZ1</i> ♣ | Pollination                  | Vazquez and Simberloff (2002) | $[\ln(0.0001) ; \ln(0.02)]$  | $[\ln(0.0011) ; \ln(0.02)]$  | $[\ln(0.001) ; \ln(0.2)]$  |
| <i>VAZ2</i> ♣ | Pollination                  | Vazquez and Simberloff (2002) | $[\ln(0.0001) ; \ln(0.011)]$ | $[\ln(0.0018) ; \ln(0.02)]$  | $[\ln(0.001) ; \ln(0.2)]$  |
| <i>VAZ3</i> ♣ | Pollination                  | Vazquez and Simberloff (2002) | $[\ln(0.0001) ; \ln(0.02)]$  | $[\ln(0.001) ; \ln(0.02)]$   | $[\ln(0.001) ; \ln(0.2)]$  |
| <i>VAZ4</i> ♣ | Pollination                  | Vazquez and Simberloff (2002) | $[\ln(0.0001) ; \ln(0.02)]$  | $[\ln(0.0017) ; \ln(0.02)]$  | $[\ln(0.001) ; \ln(0.2)]$  |
| <i>VAZ5</i> ♣ | Pollination                  | Vazquez and Simberloff (2002) | $[\ln(0.0001) ; \ln(0.02)]$  | $[\ln(0.0007) ; \ln(0.02)]$  | $[\ln(0.001) ; \ln(0.2)]$  |
| <i>VAZ6</i> ♣ | Pollination                  | Vazquez and Simberloff (2002) | $[\ln(0.0001) ; \ln(0.02)]$  | $[\ln(0.001) ; \ln(0.02)]$   | $[\ln(0.001) ; \ln(0.2)]$  |
| <i>VAZ7</i> ♣ | Pollination                  | Vazquez and Simberloff (2002) | $[\ln(0.0001) ; \ln(0.02)]$  | $[\ln(0.0007) ; \ln(0.02)]$  | $[\ln(0.001) ; \ln(0.2)]$  |
| <i>VAZ8</i> ♣ | Pollination                  | Vazquez and Simberloff (2002) | $[\ln(0.0001) ; \ln(0.02)]$  | $[\ln(0.0009) ; \ln(0.02)]$  | $[\ln(0.001) ; \ln(0.2)]$  |
| <i>HELG</i>   | Arbuscular Mycorrhizal Fungi | Helgason et al. (2002)        | $[\ln(0.0001) ; \ln(0.02)]$  | $[\ln(0.0001) ; \ln(0.02)]$  | $[\ln(0.001) ; \ln(0.2)]$  |
| <i>OPIO</i>   | Arbuscular Mycorrhizal Fungi | Opik et al. (2008)            | $[\ln(0.0001) ; \ln(0.018)]$ | $[\ln(0.001) ; \ln(0.02)]$   | $[\ln(0.001) ; \ln(0.2)]$  |
| <i>OPIY</i>   | Arbuscular Mycorrhizal Fungi | Opik et al. (2008)            | $[\ln(0.0001) ; \ln(0.02)]$  | $[\ln(0.0008) ; \ln(0.02)]$  | $[\ln(0.001) ; \ln(0.2)]$  |
| <i>WU15</i>   | Arbuscular Mycorrhizal Fungi | Wu et al. (2007)              | $[\ln(0.0001) ; \ln(0.02)]$  | $[\ln(0.0001) ; \ln(0.02)]$  | $[\ln(0.001) ; \ln(0.2)]$  |
| <i>WU16</i>   | Arbuscular Mycorrhizal Fungi | Wu et al. (2007)              | $[\ln(0.0001) ; \ln(0.02)]$  | $[\ln(0.0001) ; \ln(0.02)]$  | $[\ln(0.001) ; \ln(0.2)]$  |
| <i>JOSW</i>   | Endophytic Fungi             | Joshee et al. (2009)          | $[\ln(0.0001) ; \ln(0.01)]$  | $[\ln(0.006) ; \ln(0.02)]$   | $[\ln(0.01) ; \ln(0.2)]$   |
| <i>JOSS</i>   | Endophytic Fungi             | Joshee et al. (2009)          | $[\ln(0.0001) ; \ln(0.01)]$  | $[\ln(0.0014) ; \ln(0.02)]$  | $[\ln(0.018) ; \ln(0.2)]$  |
| <i>MUTD</i>   | Endophytic Fungi             | Murali et al. (2007)          | $[\ln(0.0001) ; \ln(0.02)]$  | $[\ln(0.0005) ; \ln(0.02)]$  | $[\ln(0.001) ; \ln(0.2)]$  |

|                          |                  |                               |                          |                          |                       |
|--------------------------|------------------|-------------------------------|--------------------------|--------------------------|-----------------------|
| <i>MUTW</i>              | Endophytic Fungi | Murali et al. (2007)          | [ln(0.0001) ; ln(0.02)]  | [ln(0.0006) ; ln(0.02)]  | [ln(0.001) ; ln(0.2)] |
| <i>MUDD</i>              | Endophytic Fungi | Murali et al. (2007)          | [ln(0.0001) ; ln(0.019)] | [ln(0.0009) ; ln(0.02)]  | [ln(0.001) ; ln(0.2)] |
| <i>MUDW</i>              | Endophytic Fungi | Murali et al. (2007)          | [ln(0.0001) ; ln(0.02)]  | [ln(0.0012) ; ln(0.02)]  | [ln(0.001) ; ln(0.2)] |
| <i>PETR</i>              | Endophytic Fungi | Petrini (1984)                | [ln(0.0001) ; ln(0.02)]  | [ln(0.0003) ; ln(0.02)]  | [ln(0.001) ; ln(0.2)] |
| <i>SURB</i>              | Endophytic Fungi | Suryanarayanan et al. (2005)  | [ln(0.0001) ; ln(0.02)]  | [ln(0.0001) ; ln(0.019)] | [ln(0.001) ; ln(0.2)] |
| <i>SURC</i>              | Endophytic Fungi | Suryanarayanan et al. (2005)  | [ln(0.0001) ; ln(0.02)]  | [ln(0.0001) ; ln(0.019)] | [ln(0.001) ; ln(0.2)] |
| <i>SURD</i>              | Endophytic Fungi | Suryanarayanan et al. (2005)  | [ln(0.0001) ; ln(0.02)]  | [ln(0.0001) ; ln(0.01)]  | [ln(0.001) ; ln(0.2)] |
| <i>SUTJ</i>              | Endophytic Fungi | Sutjaritvorakul et al. (2010) | [ln(0.0001) ; ln(0.02)]  | [ln(0.0001) ; ln(0.02)]  | [ln(0.001) ; ln(0.2)] |
| <i>BACH*</i>             | Herbivory        | Basset and Charles (2000)     | [ln(0.0001) ; ln(0.006)] | [ln(0.4001) ; ln(0.6)]   | [ln(0.003) ; ln(0.2)] |
| <i>BASA</i> <sup>◇</sup> | Herbivory        | Basset and Samuelson (1996)   | [ln(0.0001) ; ln(0.02)]  | [ln(0.006) ; ln(0.02)]   | [ln(0.035) ; ln(0.2)] |
| <i>BERK</i>              | Herbivory        | Berkov and Tavakilian (1999)  | [ln(0.0001) ; ln(0.017)] | [ln(0.0015) ; ln(0.02)]  | [ln(0.001) ; ln(0.2)] |
| <i>HANS</i>              | Herbivory        | Hansen and Ueckert (1970)     | [ln(0.0001) ; ln(0.02)]  | [ln(0.0001) ; ln(0.014)] | [ln(0.001) ; ln(0.2)] |
| <i>JANZ</i> <sup>◇</sup> | Herbivory        | Janzen (1980)                 | [ln(0.006) ; ln(0.199)]  | [ln(0.1108) ; ln(0.5)]   | [ln(0.012) ; ln(0.5)] |
| <i>JOEA</i> <sup>♣</sup> | Herbivory        | Joern (1979)                  | [ln(0.0002) ; ln(0.02)]  | [ln(0.0003) ; ln(0.02)]  | [ln(0.001) ; ln(0.2)] |
| <i>JOEM</i> <sup>♣</sup> | Herbivory        | Joern (1979)                  | [ln(0.0003) ; ln(0.02)]  | [ln(0.0007) ; ln(0.02)]  | [ln(0.001) ; ln(0.2)] |
| <i>JOER</i>              | Herbivory        | Joern (1985)                  | [ln(0.0004) ; ln(0.02)]  | [ln(0.0013) ; ln(0.02)]  | [ln(0.001) ; ln(0.2)] |
| <i>NA96</i> <sup>◇</sup> | Herbivory        | Nakagawa et al. (2003)        | [ln(0.0001) ; ln(0.02)]  | [ln(0.0005) ; ln(0.02)]  | [ln(0.001) ; ln(0.2)] |
| <i>NA98</i> <sup>◇</sup> | Herbivory        | Nakagawa et al. (2003)        | [ln(0.0001) ; ln(0.02)]  | [ln(0.0012) ; ln(0.02)]  | [ln(0.001) ; ln(0.2)] |
| <i>NOMI</i>              | Herbivory        | Novotny et al.(2005a)         | [ln(0.0001) ; ln(0.02)]  | [ln(0.0001) ; ln(0.017)] | [ln(0.001) ; ln(0.2)] |
| <i>NOVO</i> <sup>◇</sup> | Herbivory        | Novotny et al.(2005b)         | [ln(0.0001) ; ln(0.02)]  | [ln(0.0006) ; ln(0.02)]  | [ln(0.001) ; ln(0.2)] |
| <i>OTTE</i>              | Herbivory        | Otte and Joern (1977)         | [ln(0.0001) ; ln(0.02)]  | [ln(0.0001) ; ln(0.019)] | [ln(0.001) ; ln(0.2)] |
| <i>SHEL</i>              | Herbivory        | Sheldon and Rogers (1978)     | [ln(0.0001) ; ln(0.02)]  | [ln(0.0001) ; ln(0.014)] | [ln(0.001) ; ln(0.2)] |
| <i>UECK</i> <sup>◇</sup> | Herbivory        | Ueckert and Hansen (1971)     | [ln(0.0001) ; ln(0.02)]  | [ln(0.0001) ; ln(0.019)] | [ln(0.001) ; ln(0.2)] |

1 ♣Datasets found in the Interaction Web Database (<http://www.nceas.ucsb.edu/interactionweb/>).

2 ♠Datasets found in Ref. (16).

3 ◇Datasets found in Ref. (17).

4 \*For this dataset, we used in the simulations  $J_p=2000$ ,  $J_a=400$  because  $S_p$  is larger  
5 than 200.

## 1 S4.2 Predicted effect of the interactions in real networks based 2 on best-fit simulations

3 The information available in the data was not sufficient to fully parameterize our meta-  
4 community model, and hence to precisely quantify the effect of bi-trophic interactions on  
5 plant and animal richness in these datasets. It was however sufficient to greatly constrain  
6 our simulations, so that general trends could be evidenced. We illustrate this with an  
7 example dataset (BEZE, see Table S5). This dataset was chosen because it contains the  
8 largest number of recorded interactions. The limits of our inference approach that we are  
9 pointing here are thus also happening in the other datasets. Thanks to the ABC proce-  
10 dure, some parameters are relatively well inferred in that they have a reasonably peaked  
11 posterior distribution:  $\mu_p$ ,  $\mu_a$  and  $\sigma$  (Fig. S6A,B,D). All the interaction rules are rep-  
12 resented in the retained simulations (Fig. S6C), which mean that the observed network  
13 structure can be reproduced in multiple ways. Note that this explains the presence of two  
14 peaks in the posterior distribution of parameter  $\sigma$ : the peak of low  $\sigma$  value is obtained in  
15 models without threshold rules, while the other peak is obtained when one or two thresh-  
16 old rules are modeled on top of the matching rules. The four remaining parameters  $m_p$ ,  
17  $m_a$ ,  $c_p$  and  $c_a$  are less well inferred by our procedure in that they have wider posterior  
18 distribution hence a large remaining uncertainty on parameters values (Fig. S6E-H). The  
19 variance in these parameters values explained a large proportion of the variance of  $\Delta S_p$   
20 and  $\Delta S_a$  observed in the simulations. More precisely, variations in  $m_p$  and  $c_p$  were highly  
21 correlated with variations in  $\Delta S_p$  in the simulations, while variations in  $m_a$  and  $c_a$  were  
22 highly correlated with variations in  $\Delta S_a$ . This is the reason why we plot our predictions  
23 regarding the bi-trophic impact on plants (animals)  $\Delta S_p$  ( $\Delta S_a$ ) as a function of  $m_p$  and  
24  $c_p$  ( $m_a$  and  $c_a$ ) in Figs. 2, S2, S4 and S5.

25 We used a kriging technique to interpolate  $\Delta S_p$  as a function of  $m_p$  and  $c_p$  (R library

1 "fields", (18)). This interpolation explained on average 70% (64%, 45%) of the variance  
2 for plants-pollinators datasets (plant-fungi, plant-insect herbivores). Similarly, the inter-  
3 polation of  $\Delta S_a$  as a function of  $m_a$  and  $c_a$  explained on average 33% (40%, 30%) for  
4 plants-pollinators datasets (plant-fungi, plant-insect herbivores). We represent in Figs.  
5 S11- S16 the krigged values of  $\Delta S_p$  and  $\Delta S_a$  predicted by the simulations fitted to each  
6 dataset. In Fig. 3, these predictions are averaged for each dataset type (plant-pollinators,  
7 plants-fungi, and plants-insect herbivores). Similar results for  $\Delta H$ ,  $\Delta J$ ,  $\Delta J_q$ , and  $\Delta S^m/S$   
8 are reported in Figs. S7- S10. The temporal similarity is expected to decrease for an-  
9 tagonistic interactions; the same happens for mutualistic interactions only for realistically  
10 strong coupling ( $c_p$  and  $c_a \geq 0.03$ ) (Fig. S8). When using the abundance-weighted  
11 measure of turnover  $J_q$ , the temporal similarity is predicted to be weakly affected by  
12 bi-trophic interactions (Fig. S9). Overall, our results hence suggest that the temporal  
13 turnover in plant and animal sets should be larger due to bi-trophic interactions, this  
14 being due mainly to an increased turnover of rare species.

15 All simulations were performed in C++, and statistical analyses with the R software  
16 (R development Core Team 2009).

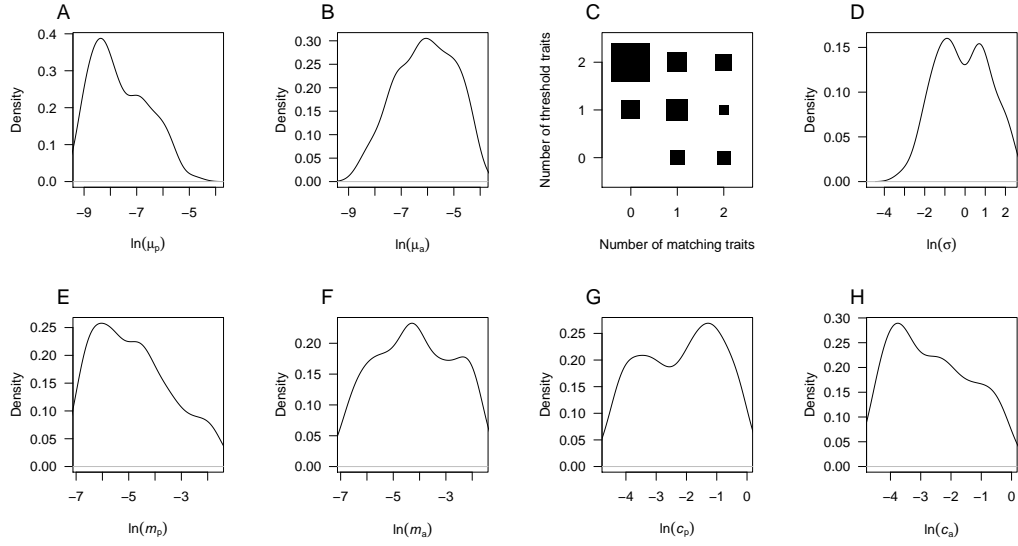

Fig. S6: Approximate posterior distribution of the model parameters. Panels A-B: approximate posterior distribution for parameters  $\mu_p$  and  $\mu_a$ . Panel C: posterior weight of the different interaction rules. The length of each square side is proportional to the number of retained simulations with the corresponding number of matching and threshold rules. Panel D: approximate posterior distribution for parameters  $\sigma$ . Panels E-H: approximate posterior distribution for parameters  $m_p$ ,  $m_a$ ,  $c_p$  and  $c_a$ .



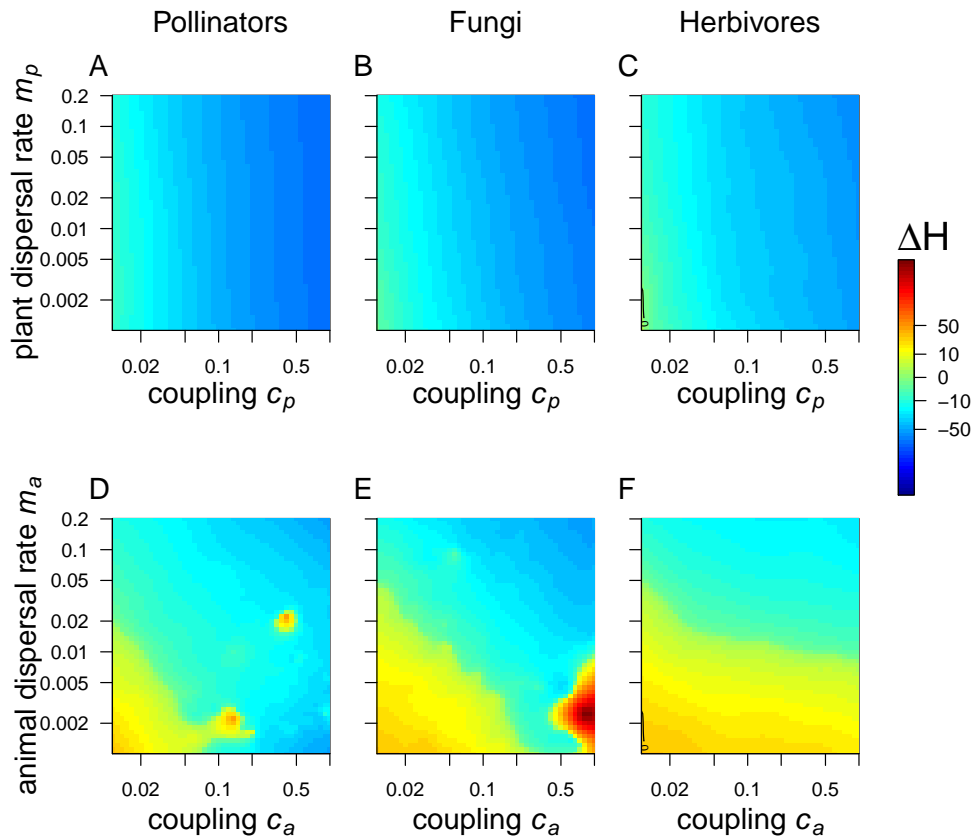

Fig. S7: Relative variation of plant and animal Shannon's index  $H$  between coupled and uncoupled communities in simulations which best fit observed network structure in real datasets. Panels A-C: results for plants. Panels D-F: results for animals. Panels A and D: Plant-pollinators datasets ( $n=23$ ). Panels B and E: Plant-fungi datasets ( $n=16$ ). Panels C and F: Plant-insect herbivores datasets ( $n=15$ ). 41% of the variance is explained by the interpolation on average in each dataset.

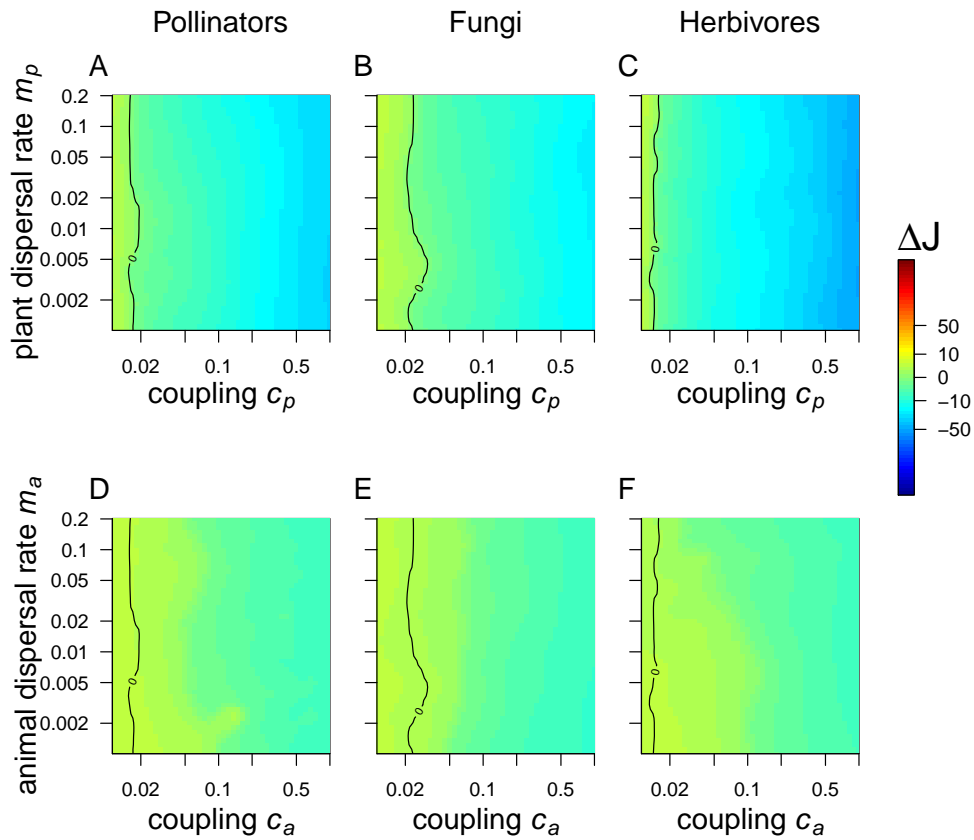

Fig. S8: Relative variation of plant and animal temporal similarity  $J$  between coupled and uncoupled communities in simulations which best fit observed network structure in real datasets. Panels A-C: results for plants. Panels D-F: results for animals. Panels A and D: Plant-pollinators datasets ( $n=23$ ). Panels B and E: Plant-fungi datasets ( $n=16$ ). Panels C and F: Plant-insect herbivores datasets ( $n=15$ ). 21% of the variance is explained by the interpolation on average in each dataset.

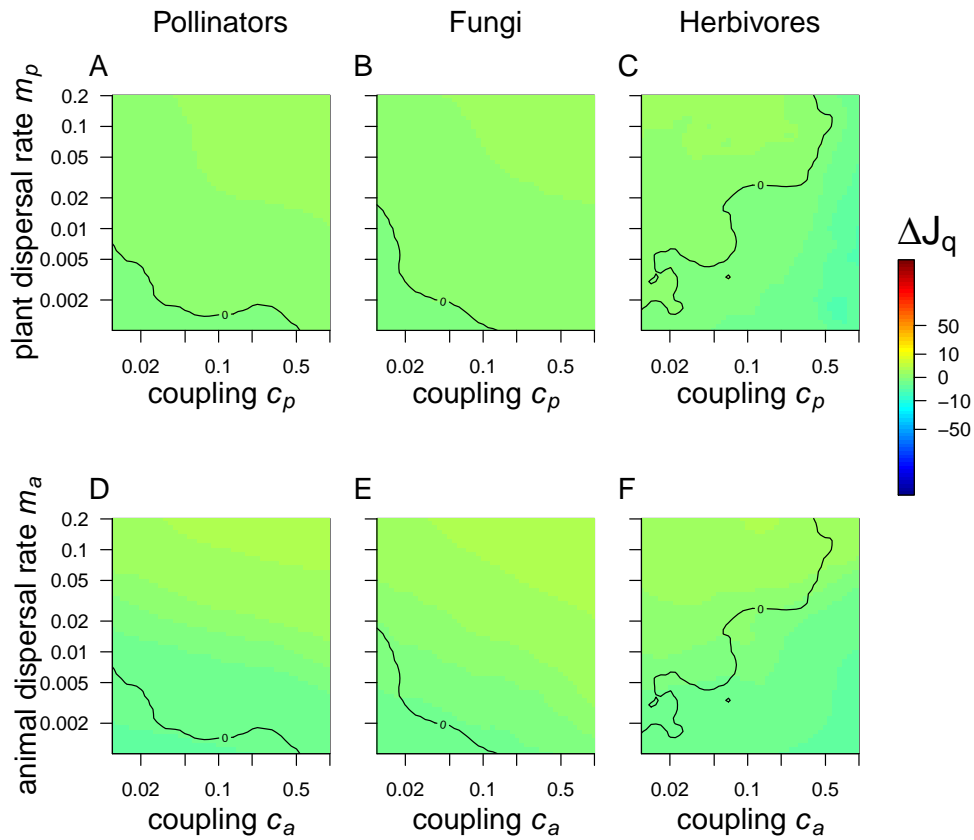

Fig. S9: Relative variation of plant and animal temporal similarity  $J_q$  between coupled and uncoupled communities in simulations which best fit observed network structure in real datasets. Panels A-C: results for plants. Panels D-F: results for animals. Panels A and D: Plant-pollinators datasets ( $n=23$ ). Panels B and E: Plant-fungi datasets ( $n=16$ ). Panels C and F: Plant-insect herbivores datasets ( $n=15$ ). 33% of the variance is explained by the interpolation on average in each dataset.

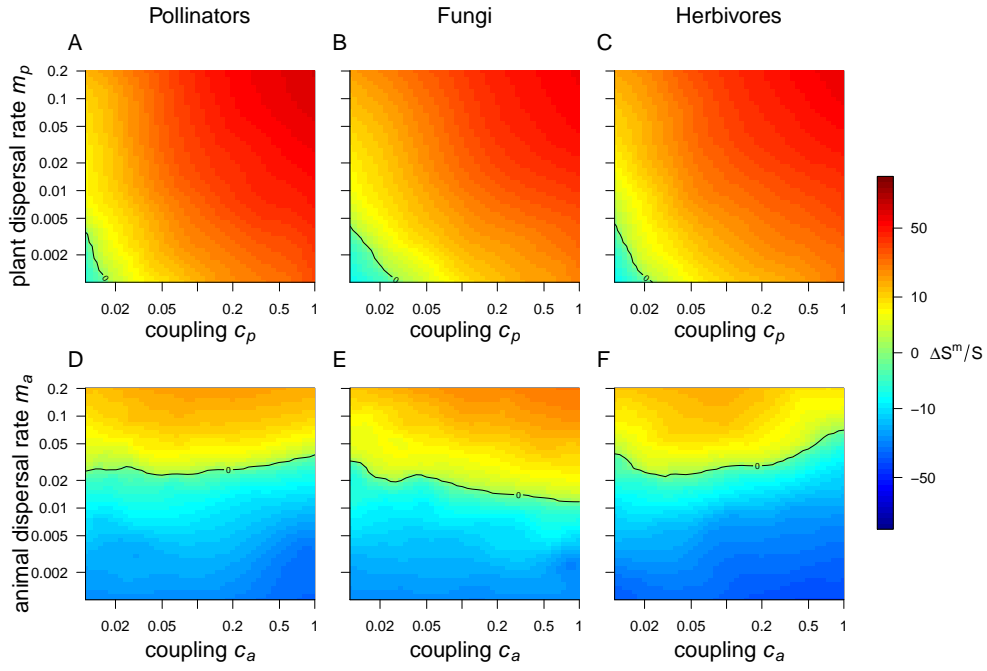

Fig. S10: Relative variation of plant and animal  $\beta$  diversity  $S^m/S$  between coupled and uncoupled communities in simulations which best fit observed network structure in real datasets. Panels A-C: results for plants. Panels D-F: results for animals. Panels A and D: Plant-pollinators datasets (n=23). Panels B and E: Plant-fungi datasets (n=16). Panels C and F: Plant-insect herbivores datasets (n=15). 31% of the variance is explained by the interpolation on average in each dataset.

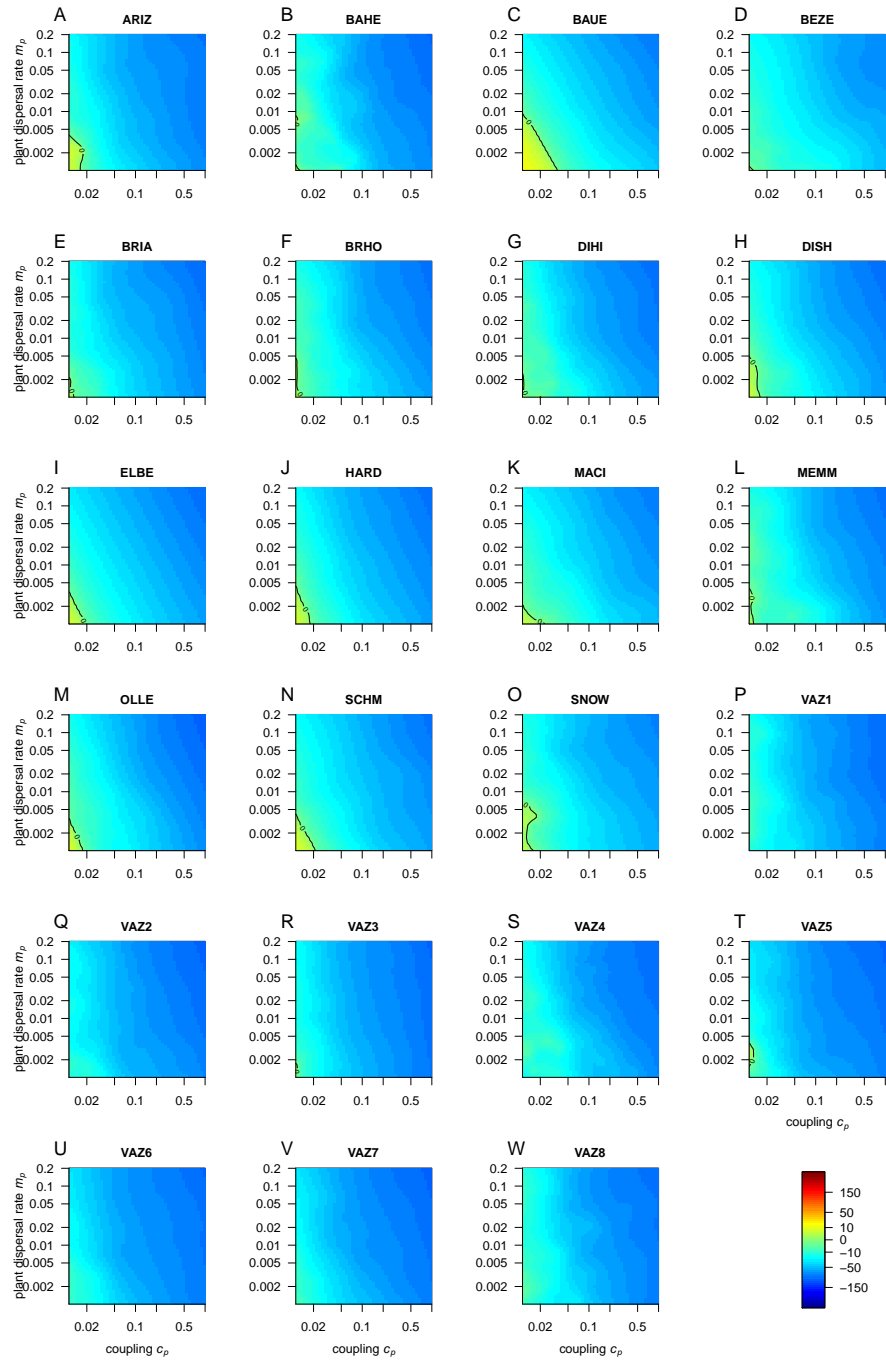

Fig. S11: Relative variation of plant species richness between coupled and uncoupled communities in simulations which best fit observed network structure in real plant-pollinator datasets.

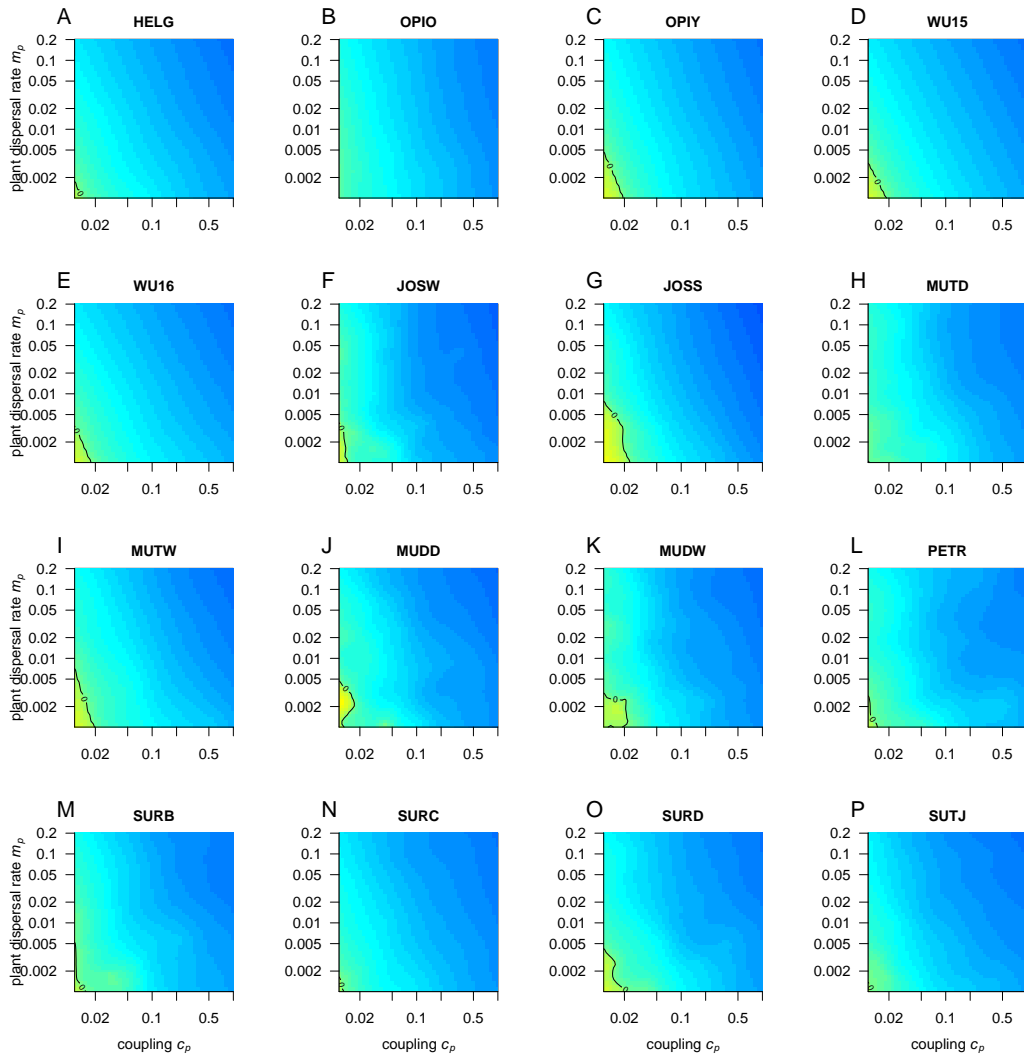

Fig. S12: Relative variation of plant species richness between coupled and uncoupled communities in simulations which best fit observed network structure in real plant-fungi datasets.

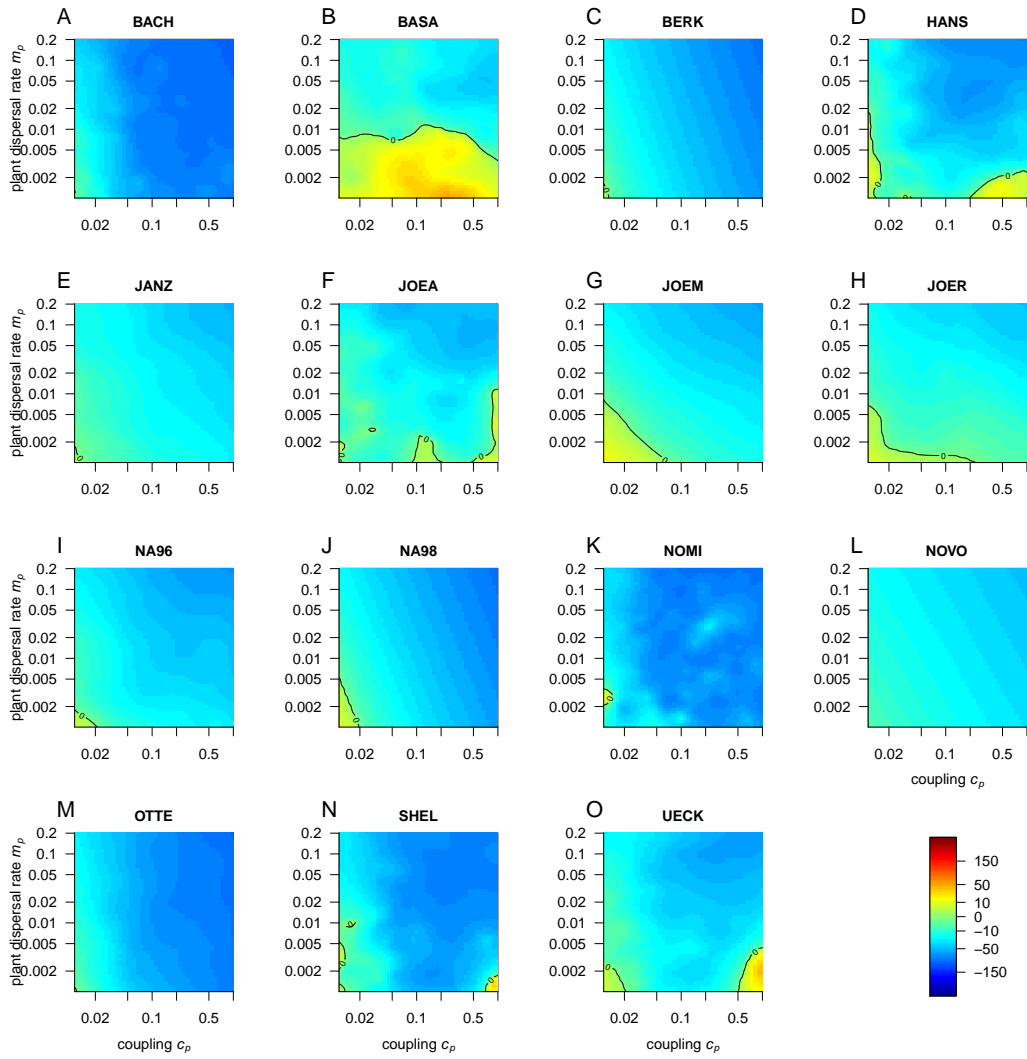

Fig. S13: Relative variation of plant species richness between coupled and uncoupled communities in simulations which best fit observed network structure in real plant-insect herbivores datasets.

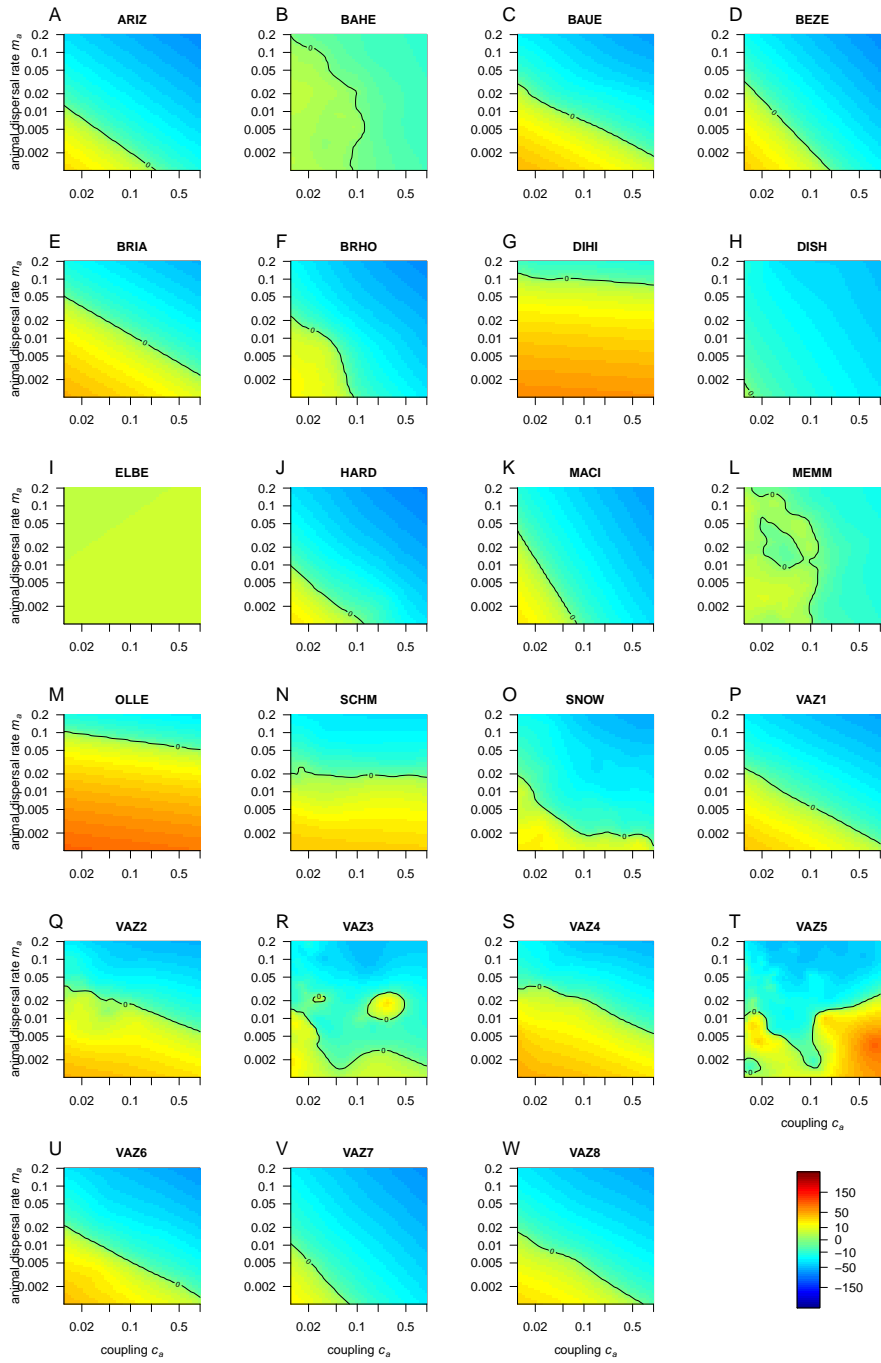

Fig. S14: Relative variation of animal species richness between coupled and uncoupled communities in simulations which best fit observed network structure in real plant-pollinator datasets.



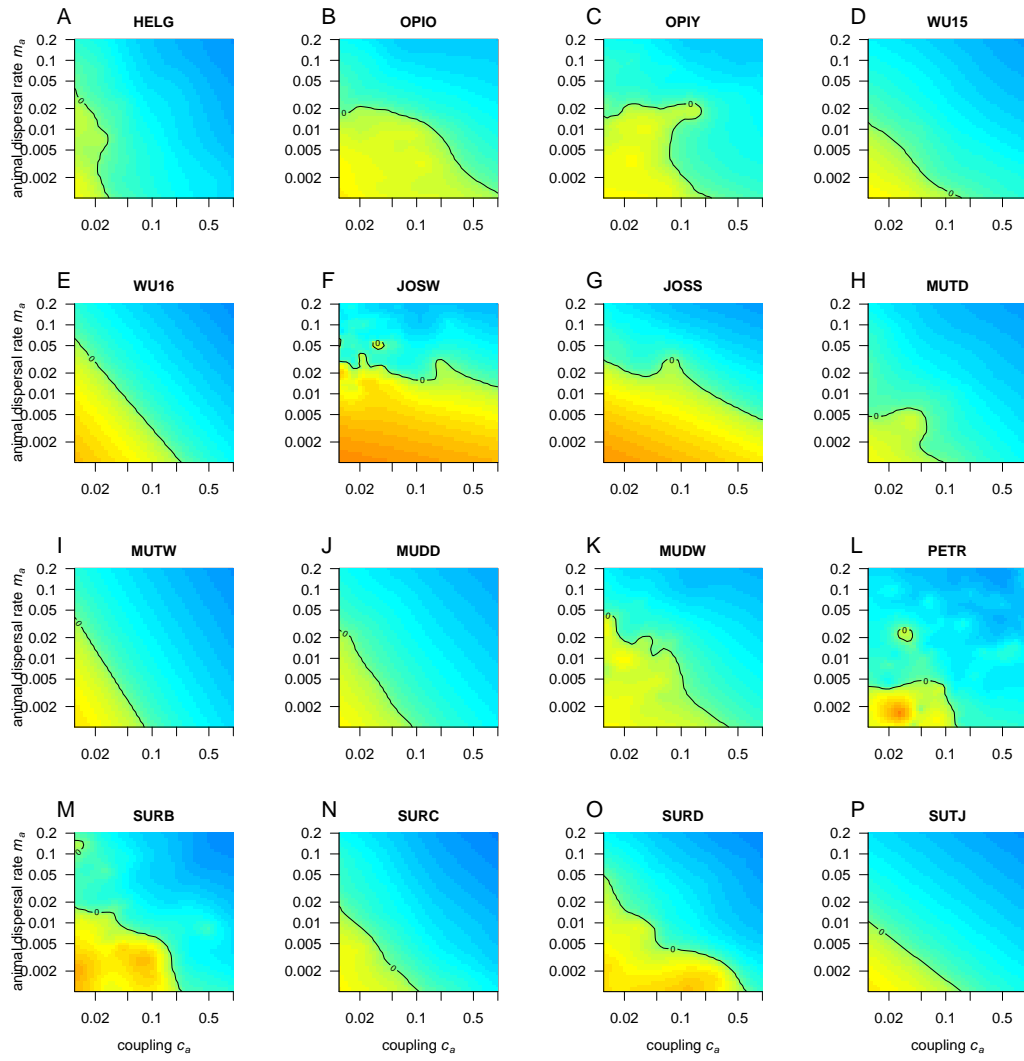

Fig. S15: Relative variation of animal species richness between coupled and uncoupled communities in simulations which best fit observed network structure in real plant-fungi datasets.

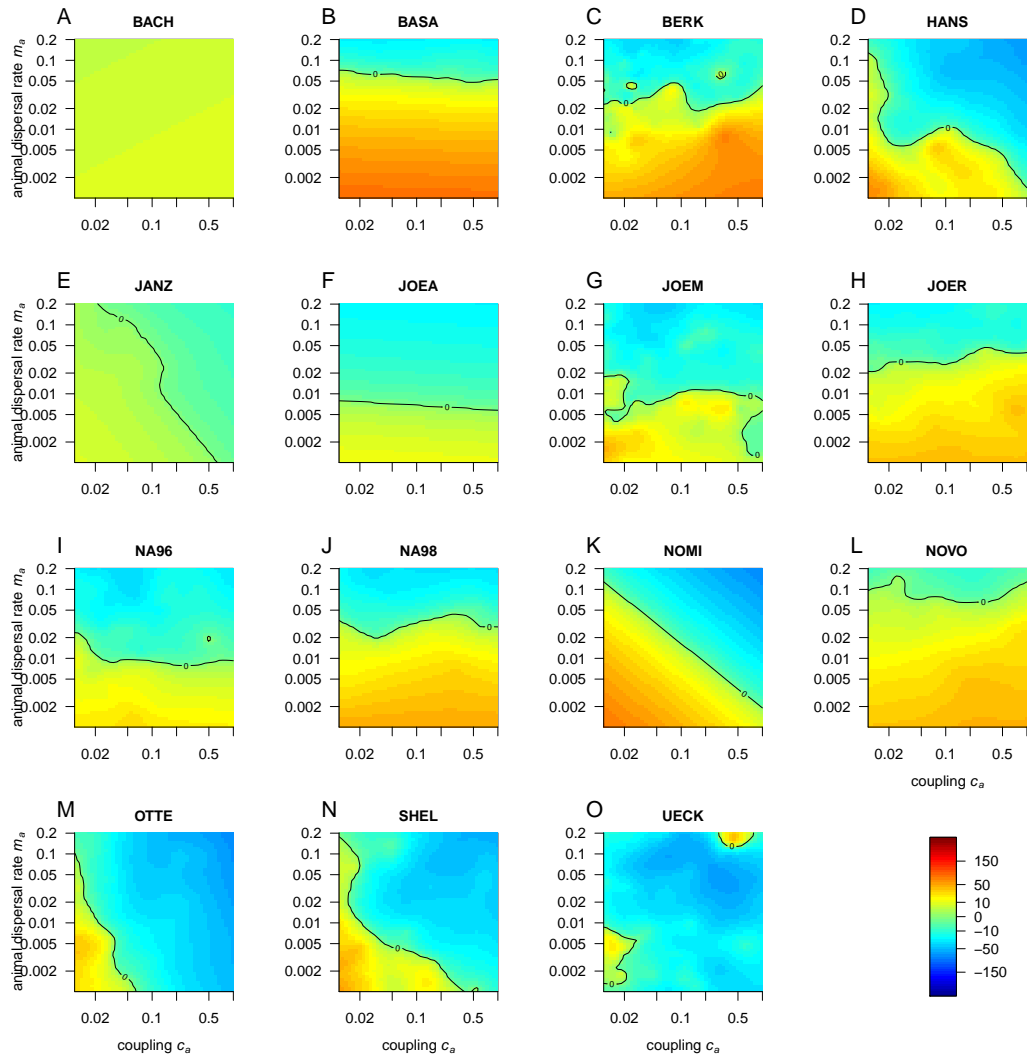

Fig. S16: Relative variation of animal species richness between coupled and uncoupled communities in simulations which best fit observed network structure in real plant-insect herbivores datasets.

## References

- [1] Chesson PL, Warner RR (1981) Environmental variability promotes coexistence in lottery competitive systems. *Am Nat* 117:923–943.
- [2] Alonso D, Etienne RS, McKane AJ (2006) The merits of neutral theory *Trends Ecol Evol* 21:451–457.
- [3] Crawley MJ (1989) Insect herbivores and plant population dynamics. *Annu Rev Entom* 34:531–564.
- [4] Varley GC, Gradwell GR, Hassell MP (1974) *Insect Population Ecology - An Analytical Approach* (University of California Press).
- [5] Bastolla U, et al. (2009) The architecture of mutualistic networks minimizes competition and increases biodiversity. *Nature* 458:1018–1021.
- [6] Chesson P (2000) Mechanisms of maintenance of species diversity. *Annu Rev Ecol Evol Sys* 31:343–366.
- [7] Zhou SR, Zhang DY (2008) A nearly neutral model of biodiversity. *Ecology* 89:248–258.
- [8] Hillebrand H, et al. (2007) Consumer versus resource control of producer diversity depends on ecosystem type and producer community structure. *Proc Natl Acad Sci USA* 104:10904–10909.
- [9] Thébault E, Fontaine C (2010) Stability of ecological communities and the architecture of mutualistic and trophic networks. *Science* 329:853–856.

- [10] Magurran A, Henderson P (2003) Explaining the excess of rare species in natural species abundance distributions. *Nature* 422:714–716.
- [11] Warton D, Weber N (2002) Common slope tests for bivariate structural relationships. *Biometrical Journal* 44:161–174.
- [12] Tilman D (1982) *Resource Competition and Community Structure* (Princeton University Press).
- [13] Janzen DH (1970) Herbivores and the number of tree species in tropical forests. *Am Nat* 104:501–528.
- [14] Santamaría L, Rodríguez-Gironés MA (2007) Linkage rules for plant-pollinator networks: Trait complementarity or exploitation barriers? *Plos Biol* 5:354–362.
- [15] Beaumont M, Zhang W, Balding D (2002) Approximate bayesian computation in population genetics. *Genetics* 162:2025–2035.
- [16] Rezende E, Lavabre J, Guimarães P, Jordano P, Bascompte J (2007) Non-random coextinctions in phylogenetically structured mutualistic networks. *Nature* 448:925–929.
- [17] Thébault E, Fontaine C (2008) Does asymmetric specialization differ between mutualistic and trophic networks? *Oikos* 117:555–563.
- [18] Furrer R, Nychka D, Sain S (2009) *fields: Tools for spatial data* R package version 6.01.
- [19] Arizmendi M, Ornelas J (1990) Hummingbirds and their floral resources in a tropical dry forest in Mexico. *Biotropica* 22:172–180.

- [20] Barrett S, Helenurm K (1987) The reproductive biology of boreal forest herbs. i. breeding systems and pollination. *Can J Bot* 65:2036–2046.
- [21] Bauer P (1983) Bumblebee pollination relationships on the beartooth plateau tundra of southern montana. *Am J Bot* 70:134–144.
- [22] Bezerra E, Machado I, Mello M (2009) Pollination networks of oil-flowers: a tiny world within the smallest of all worlds. *J Anim Ecol* 78:1096–1101.
- [23] Brian A (1957) Differences in the flowers visited by four species of bumble-bees and their causes. *J Anim Ecol* 26:71–98.
- [24] Brown E, Hopkins M (1995) A test of pollinator specificity and morphological convergence between nectarivorous birds and rainforest tree flowers in new guinea. *Oecologia* 103:89–100.
- [25] Dicks L, Corbet S, Pywell R (2002) Compartmentalization in plant-insect flower visitor webs. *J Anim Ecol* 71:32–43.
- [26] Elberling H, Olesen J (1999) The structure of a high latitude plant-flower visitor system: the dominance of flies. *Ecography* 22:314–323.
- [27] Harder L (1985) Morphology as a predictor of flower choice by bumble bees. *Ecology* 66:198–210.
- [28] Macior L (1978) Ecology of vernal angiosperms. *Oikos* 30:452–460.
- [29] Memmott J (1999) The structure of a plant-pollinator food web. *Ecol Lett* 2:276–280.
- [30] Ollerton J, Johnson S, Cranmer L, Kellie S (2003) Pollination ecology of an assemblage of grassland asclepiads in south africa. *Ann Bot* 92:807–834.

- [31] Schemske D (1978) Flowering ecology of some spring woodland herbs. *Ecology* 59:351–366.
- [32] Snow B, Snow D (1972) Feeding niches of hummingbirds in a trinidad valley. *J Anim Ecol* 41:471–485.
- [33] Vazquez D, Simberloff D (2002) Ecological specialization and susceptibility to disturbance: conjectures and refutations. *Am Nat* 159:606–623.
- [34] Helgason T, et al. (2002) Selectivity and functional diversity in arbuscular mycorrhizas of co-occurring fungi and plants from a temperate deciduous woodland. *J Ecol* 90:371–384.
- [35] Opik M, et al. (2008) High diversity of arbuscular mycorrhizal fungi in a boreal herb-rich coniferous forest. *New Phytol* 179:867–876.
- [36] Wu B, Hogetsu T, Isobe K, Ishii R (2007) Community structure of arbuscular mycorrhizal fungi in a primary successional volcanic desert on the southeast slope of mount fuji. *Mycorrhiza* 17:495–506.
- [37] Joshee S, Paulus B, Park D, Johnston P (2009) Diversity and distribution of fungal foliar endophytes in new zealand podocarpaceae. *Mycol Res* 113:1003–1015.
- [38] Murali T, Suryanarayanan T, Venkatesan G (2007) Fungal endophyte communities in two tropical forests of southern india: diversity and host affiliation. *Mycol Progr* 6:191–199.
- [39] Petrini O (1984) Endophytic fungi in british ericaceae: a preliminary study. *Transactions of the British Mycological Society* 83:510–512.

- [40] Suryanarayanan T, Wittlinger S, Faeth S (2005) Endophytic fungi associated with cacti in arizona. *Mycol Res* 109:635–639.
- [41] Sutjaritvorakul T, Whalley A, Sihanonth P, Roengsumran S (2010) Antimicrobial activity from endophytic fungi isolated from plant leaves in dipterocarpous forest at viengsa district nan province, thailand. *J Agric Techno* 6:309–315.
- [42] Basset Y, Charles E (2000) An annotated list of insect herbivores foraging on the seedlings of five forest trees in guyana. *Annals of the Society of Entomology of Brasil* 29:433–452.
- [43] Basset Y, Samuelson G (1996) in *Chrysomelidae Biology. Vol. 2: Ecological Studies*, eds Jolivet P, Cox M (SPB Academic Publishing), pp 243–262.
- [44] Berkov A, Tavakilian G (1999) Host utilization of the brazil nut family (lecythidaceae) by sympatric wood-boring species of palame (coleoptera, cerambycidae, lamiinae, acanthocinini). *Biol J Linn Soc* 67:181–198.
- [45] Hansen R, Ueckert D (1970) Dietary similarity of some primary consumers. *Ecology* 51:640–648.
- [46] Janzen D (1980) Specificity of seed-attacking beetles in a costa rican deciduous forest. *J Ecol* 68:929–952.
- [47] Joern A (1979) Feeding patterns in grasshoppers (orthoptera: Acrididae): factors influencing diet specialization. *Oecologia* 38:325–347.
- [48] Joern A (1985) Grasshopper dietary (orthoptera: Acrididae) from a nebraska sand hills prairie. *Transactions of the Nebraska Academy of Sciences* 13:21–32.

- [49] Nakagawa M, et al. (2003) Resource use of insect seed predators during general flowering and seeding events in a bornean dipterocarp rain forest. *Bull Entom Res* 93:455–466.
- [50] Novotny V, et al. (2005) An altitudinal comparison of caterpillar (lepidoptera) assemblages on ficus trees in papua new guinea. *J Biogeo* 32:1303–1314.
- [51] Novotny V, Clarke A, Drew R, Balagawi S, Clifford B (2005) Host specialization and species richness of fruit flies (diptera: Tephritidae) in a new guinea rain forest. *J Tropic Ecol* 21:67–77.
- [52] Otte D, Joern A (1977) On feeding patterns in desert grasshoppers and the evolution of specialized diets. *Proceedings of the Academy of Natural Sciences of Philadelphia* 128:89–126.
- [53] Sheldon J, Rogers L (1978) Grasshopper food habits within a shrub-steppe community. *Oecologia* 32:85–92.
- [54] Ueckert D, Hansen R (1971) Dietary overlap of grasshoppers on sandhill rangeland in northeastern colorado. *Oecologia* 8:276–295.
